# Supplementary material for: Health service costs of treating venous leg ulcers in the UK: evidence from a cross-sectional survey based in the north west of England
Source: PubMed Central journal article supplement — BMJ Open. 2022 Jan 6;12(1):e056790. doi: 10.1136/bmjopen-2021-056790 (PMC8739075; doi:10.1136/bmjopen-2021-056790), 2022-01-06
Supplement: bmjopen-2021-056790.draft_revisions.pdf [file bmjopen-2021-056790.draft_revisions.pdf]

# BMJ Open

BMJ Open is committed to open peer review. As part of this commitment we make the peer review history of every article we publish publicly available.

When an article is published we post the peer reviewers' comments and the authors' responses online. We also post the versions of the paper that were used during peer review. These are the versions that the peer review comments apply to.

The versions of the paper that follow are the versions that were submitted during the peer review process. They are not the versions of record or the final published versions. They should not be cited or distributed as the published version of this manuscript.

BMJ Open is an open access journal and the full, final, typeset and author-corrected version of record of the manuscript is available on our site with no access controls, subscription charges or pay-per-view fees (<http://bmjopen.bmj.com>).

If you have any questions on BMJ Open's open peer review process please email [info.bmjopen@bmj.com](mailto:info.bmjopen@bmj.com)

# BMJ Open

## The health service costs of treating venous leg ulcers in the UK

|                               |                                                                                                                                                                                                                                                                                                               |
|-------------------------------|---------------------------------------------------------------------------------------------------------------------------------------------------------------------------------------------------------------------------------------------------------------------------------------------------------------|
| Journal:                      | <i>BMJ Open</i>                                                                                                                                                                                                                                                                                               |
| Manuscript ID                 | bmjopen-2021-056790                                                                                                                                                                                                                                                                                           |
| Article Type:                 | Original research                                                                                                                                                                                                                                                                                             |
| Date Submitted by the Author: | 25-Aug-2021                                                                                                                                                                                                                                                                                                   |
| Complete List of Authors:     | Urwin, Sean; University of Manchester, Health Organisation, Policy and Economics<br>Dumville, Jo C.; The University of Manchester,<br>Sutton, Matt; University of Manchester,<br>Cullum, Nicky; The University of Manchester, School of Health Sciences;<br>Manchester University NHS Foundation Trust, MAHSC |
| Keywords:                     | HEALTH ECONOMICS, WOUND MANAGEMENT, EPIDEMIOLOGY                                                                                                                                                                                                                                                              |
|                               |                                                                                                                                                                                                                                                                                                               |

SCHOLARONE™  
Manuscripts

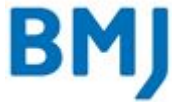

I, the Submitting Author has the right to grant and does grant on behalf of all authors of the Work (as defined in the below author licence), an exclusive licence and/or a non-exclusive licence for contributions from authors who are: i) UK Crown employees; ii) where BMJ has agreed a CC-BY licence shall apply, and/or iii) in accordance with the terms applicable for US Federal Government officers or employees acting as part of their official duties; on a worldwide, perpetual, irrevocable, royalty-free basis to BMJ Publishing Group Ltd ("BMJ") its licensees and where the relevant Journal is co-owned by BMJ to the co-owners of the Journal, to publish the Work in this journal and any other BMJ products and to exploit all rights, as set out in our [licence](#).

The Submitting Author accepts and understands that any supply made under these terms is made by BMJ to the Submitting Author unless you are acting as an employee on behalf of your employer or a postgraduate student of an affiliated institution which is paying any applicable article publishing charge ("APC") for Open Access articles. Where the Submitting Author wishes to make the Work available on an Open Access basis (and intends to pay the relevant APC), the terms of reuse of such Open Access shall be governed by a Creative Commons licence – details of these licences and which [Creative Commons](#) licence will apply to this Work are set out in our licence referred to above.

Other than as permitted in any relevant BMJ Author's Self Archiving Policies, I confirm this Work has not been accepted for publication elsewhere, is not being considered for publication elsewhere and does not duplicate material already published. I confirm all authors consent to publication of this Work and authorise the granting of this licence.

## The health service costs of treating venous leg ulcers in the UK

Authors: Sean Urwin, Jo Dumville, Matt Sutton Nicky Cullum

Sean Urwin, PhD Student in Health Economics, Health organisation, Policy and Economics, Williamson Building, University of Manchester, Oxford Road, Manchester, M13 9PL, UK

Jo Dumville, Professor of Applied Health Research , Division of Nursing, Midwifery and Social Work, Manchester Academic Health Science Centre, Jean McFarlane Building, University of Manchester, Oxford Road, Manchester, M13 9PL, UK

Matt Sutton, Professor of Health Economics, Health organisation, Policy and Economics, Williamson Building, University of Manchester, Oxford Road, Manchester, M13 9PL, UK

Nicky Cullum, Professor of Nursing, Division of Nursing, Midwifery and Social Work, Manchester Academic Health Science Centre, Jean McFarlane Building, University of Manchester, Oxford Road, Manchester, M13 9PL, UK

Corresponding Author:

Sean Urwin [sean.urwin@manchester.ac.uk](mailto:sean.urwin@manchester.ac.uk)

**Word Count:** 3880

**Keywords:** health economics, wound management, epidemiology, cost of illness, ulcers, wounds

## Abstract

**Objectives:** To estimate and examine the direct healthcare costs of treating people with open venous leg ulcers in the UK.

**Methods:** We performed a cost-of-illness study using resource and prevalence data from a cross-sectional survey of nine NHS community locales over two week periods in 2015/2016. Examination of variation in these obtained costs was performed by ordinary least squares regression. We used additional resource use information from a randomised control trial and extrapolated costs to the UK for an annual period.

**Results:** The average two-week per person cost of treating a venous leg ulceration was estimated at £166.39 (95% CI: £157.78 to £175.00) with community staff time making up over half of this amount. Costs were higher where anti-microbial dressings were used and where wound care was delivered in the home. We derived a point prevalence of people with one or more venous leg ulcer of 2.9 per 10,000 population and estimated that the annual prevalence could be no greater than 76.8 per 10,000 population. Our estimated national cost of treating a venous leg ulcer was estimated at £95.11 million with a per person annual cost at £4842.48.

**Conclusion:** Our point prevalence figures are in line with the literature. However, our annual prevalence estimations and costs are far lower than those reported in recent literature which suggests that the costs of treating venous leg ulcers are lower than previously thought. Movement towards routinely collected and useable community care activity would help provide a transparent and deeper understanding of the scale and cost of wound care in the UK.

1  
2  
3  
4  
5  
6  
7 **Strengths and limitations of this study**  
8

9 This work uses contemporary data collected from community health services at the point of wound care  
10 delivery to estimate the direct healthcare costs of treating venous leg ulcers in the UK.  
11

12  
13 We find that the direct healthcare costs associated with venous leg ulcer treatment are substantial but  
14 significantly lower than has been previously estimated.  
15

16  
17 We do not include the costs of ulcer prevention activity nor indirect costs such as productivity losses.  
18  
19  
20  
21  
22  
23  
24  
25  
26  
27  
28  
29  
30  
31  
32  
33  
34  
35  
36  
37  
38  
39  
40  
41  
42  
43  
44  
45  
46  
47  
48  
49  
50  
51  
52  
53  
54  
55  
56  
57  
58  
59  
60

For peer review only

## 1. Introduction

Venous leg ulcers are open wounds that are relatively common in older people. These wounds result from impaired blood flow in damaged or diseased leg veins, leading to complex physiological changes that result in skin breakdown and poor healing. Venous leg ulcers are typically long lasting, have a high risk of recurrence and a negative impact on health related quality of life [1,2]. In the UK, complex wounds, of which venous leg ulcers are the most common type, are mainly treated in the community by nursing teams [3,4].

Cost-of-illness studies of particular health conditions can provide useful support for service planning. Cost is an important metric as it can: quantify the scale of a condition or illness in monetary terms; justify interventions and policy focus; assist in the allocation of resources to the management of different conditions and provide the basis for an economic evaluation [5]. Analysis of the variation in a cost-of-illness by sub-groups is an informative feature of these studies of interest to public health decision makers [6].

One set of estimates of the cost to the NHS of managing people with venous leg ulcers have been widely used and have contributed to the development of a national wound care strategy. These estimates were based on routinely collected primary care data (The Health Improvement Network (THIN) database) [7]. The mean cost (of staff time and wound care) of a venous leg ulcer per annum was estimated as £7600 in the UK at 2015/16 prices with community nursing time accounting for 78% of this cost [7]. Also using primary care data the annual cost (of staff time and treatments) of venous leg ulcer care attributable to the NHS in the UK was reported as £941 million, with a further £836 million attributable to unspecified leg ulcers [8].

Whilst routinely collected primary care data may provide a useful insight into the cost of managing venous leg ulcers, there are potential limitations. Primary care data may not capture all community based activity (e.g., community nursing care) and it is challenging to separate wound-related care activity from activity related to co-morbidities. It is crucial to obtain costs we are confident are incurred due to the venous leg ulcer (the incremental cost); so that we can calculate the costs that could be reduced if a venous leg ulcer is prevented or healed.

Alternative data with which to explore the cost of venous leg ulcers to the health service are those from community nursing teams directly, supplemented by information about primary and secondary care resource use. Availability of these data is generally limited, with historically low use of electronic records and a lack of standardised data collection in community health care. Collection of 'real world data' from the community on resource use associated with venous leg ulcer care offers a desirable addition to the knowledge base on wound care costs.

1  
2  
3 We have three aims in this paper. Firstly, to estimate the direct healthcare costs of treating people with  
4 open venous leg ulcers, using survey data collected from NHS organisations in the North West of  
5 England. We combine our survey data with healthcare data from a community-focused, pragmatic  
6 randomised control trial involving people with venous leg ulcers [9] which included estimates of  
7 healthcare use from hospital and primary care providers. Second, we examine whether, and to what  
8 extent, patient and wound-related characteristics are associated with differences in the community costs  
9 of venous leg ulcer treatment, as there is little evidence on this currently available. Third, we extrapolate  
10 the direct care costs of venous leg ulcers to the whole of the UK.  
11  
12  
13  
14  
15  
16  
17

## 18 **2 Methods**

### 19 **2.1 Study Design and Data**

20  
21 We performed a cost-of-illness study of venous leg ulcer treatment from the healthcare provider (NHS)  
22 perspective, including only direct healthcare costs. We used a ‘bottom up’ costing methodology and  
23 took a prevalence-based approach. We followed the guidance on reporting for cost-of-illness studies  
24 provided by Costa et al [10], Molinier et al [11], and Larg and Moss [12]. Further, we referred to  
25 systematic reviews of cost-of-illness studies of wound care to ensure we reported the key components  
26 relevant to the costing of wounds [13,14].  
27  
28  
29  
30

31 We obtained resource use and prevalence data from cross-sectional surveys covering two-week periods  
32 in June/August 2015 in four community NHS locales and in July 2016 in a further five NHS community  
33 locales. The two-week data collection periods enabled community healthcare professionals to record  
34 resource use once for each patient on their caseload. The strategy of data collection was based on a  
35 previous study conducted in the city of Leeds, England [15].  
36  
37  
38  
39

40 For this survey, one study form was completed for each person treated for a complex wound (including  
41 those with venous leg ulcers) by NHS community services during each two-week survey. The form  
42 captured data about each service user’s current wound and its care (see [3] for full details of survey  
43 methods); focusing on treatments directly related to each person’s primary (most severe) wound at that  
44 time (as judged by the healthcare professional completing the form). Our cost-of-illness estimate used  
45 patient level data only from people whose most severe wound was a venous leg ulcer. The survey also  
46 asked about the number of nurse visits per week for ulcer care and the duration of these visits. Each  
47 survey questionnaire was completed by the NHS health professional who had the most contact with the  
48 patient for ulcer-related care. The survey was anonymised and completed away from the ‘bedside’ with  
49 no direct input from the patient.  
50  
51  
52  
53  
54  
55

56 The survey only collected data on community activity, so we used primary and secondary care resource  
57 use data from another important research source, VenUS IV [9]. This pragmatic trial compared two  
58  
59  
60



forms of compression treatment for people with one or more venous leg ulcer. The study performed a full economic analysis and as part of this, every three months for a maximum of 12 months, participants reported ulcer-related use of NHS services. We used the trial data to estimate typical resource use/costs of ulcer-related visits to the GP (surgery and home visits), practice nurse, hospital outpatient appointments (with a doctor or nurse) and hospital admissions (either day case or longer stays).

The combination of community activity from the survey and primary and secondary care costs from the trial ensured representation of all relevant resource use in the cost calculations for ulcer treatment.

## 2.2 Community Care Costs

We costed five elements of resource used from the survey data: all dressings, all bandages, hosiery, medication, and staff time. We assumed that: dressings and bandages were changed at every visit by a community nurse, with the number of visits based on the average number of community nurse visits (derived from the survey data). Where compression hosiery was recorded, we assumed use of a single hosiery kit for three months (or two in six months) and medication costs were for every two weeks. We applied a cost of zero if dressing, bandage, hosiery, medication or community healthcare use information was not recorded in the survey as we assumed the patient had not been treated with these.

Average costs for dressings, hosiery, bandage and medication were obtained using unit costs from the British National Formulary [16] (shown in appendix Table A1). We took the number and duration of community nurse visits directly from the survey and applied the hourly unit cost (from the mean of wage bands 5 to 7) from Personal Social Services Research Unit (PSSRU) unit costs at 2019 [17]. We included travel time associated with a nurse visit only if the patient received most of their hands-on wound care in a non-clinical setting (i.e. not in a community/clinic/health centre/GP practice). We did not have information on travel distances and therefore costed travel time on a per-visit basis.

We calculated the mean two-week community-associated health service cost of treating an individual's venous leg ulcer by summing dressing, hosiery, bandage, medication and staff costs at 2019 prices. The focus was over two weeks as this was the period of time over which the survey was conducted and where weekly values were reported (e.g., number of clinic visits per week), we multiplied them by two.

## 2.3 Variation in Community Care Costs

We explored whether, and to what degree, patient characteristics (age, sex, number of wounds, number of co-morbidities, ethnic group, patient mobility and location of most care delivery) and patient receipt of different resources (type of primary dressing, any secondary dressing use, bandage use and hosiery use) were associated with variations in the total two-week community care cost. Variation in the total cost by dressing type is of relevance as there is current uncertainty about the clinical effectiveness of antimicrobial dressings, which also have a higher unit cost than non-antimicrobial dressings. Further,

1  
2  
3 current guidelines do not recommend the use of antimicrobial dressings [18] but there has been  
4 increased annual expenditure on this dressing type [19]. We identify variation in the cost of a venous  
5 leg ulcer derived from our survey data via ordinary least squares regression. We include patients with  
6 complete information on patient characteristics and who also have a cost recorded for one out of the  
7 four cost components.  
8  
9  
10

## 11 **2.4 Primary and Secondary Care Costs**

12 Primary and secondary care cost information was taken as a per participant cost directly from values  
13 calculated in VenUS IV [9]. This was a cost of £998.31 per participant inflated to 2019 prices using the  
14 NHS pay and prices cost inflation index from £907.60 [17] and divided to obtain a per two-week cost.  
15  
16  
17  
18  
19

## 20 **2.5 Extrapolation of prevalence to a national level**

21 To calculate a national point prevalence for people in the community being treated for venous leg  
22 ulceration we first divided the number of those with a venous leg ulcer (as the most severe wound) in  
23 the survey with the total population covered by the North West locales in 2015 (at 1,935,683) [3]. We  
24 then applied this local point prevalence figure to the UK population of 66,796,800 for mid-2019 [20]  
25 which assumes that the point prevalence in the North West is similar to the rest of the UK. We further  
26 assume that our point prevalence is representative at every point of the year across the UK  
27  
28  
29  
30  
31

32 We were not able to calculate annual prevalence figures (in terms of people with one or more venous  
33 leg ulcer episode in a year) with our data: we lacked detailed contemporary incidence and ulcer duration  
34 data for individuals over this period. We could however, use our available data to estimate what the  
35 maximum annual prevalence of people with venous leg ulcers receiving treatment in the community  
36 may be by assuming a new set of patients being treated for a venous leg ulcer for every two-week period  
37 of the year. We did this to give a suggested minimum (our point prevalence figure) and maximum figure  
38 for the national annual prevalence of people treated in the community for venous leg ulceration. We  
39 also estimated an annual period prevalence of venous leg ulcers using the incidence rate estimated by  
40 Petherick et al [21] using THIN data. As sensitivity around our prevalence results, we further include  
41 patients who have a venous leg ulcer that is not their most severe wound.  
42  
43  
44  
45  
46  
47  
48

## 49 **2.6 Extrapolation of cost to a national level**

50 To calculate the total annual cost of care for venous leg ulcers in UK we used our individual level cost  
51 data combined with our point prevalence estimate. The snapshot of data is assumed to be representative  
52 at the local level in terms of the costs and numbers of those with a venous leg ulcer of any two-week  
53 point in the year. Therefore, we can scale the total cost obtained in our data to achieve the annual  
54 national cost of community treated venous leg ulcers. As noted earlier, due to data limitations we can  
55 only speculate what the corresponding annual prevalence associated with the annual cost we produce  
56  
57  
58  
59  
60

could be. The annual prevalence figures we derive from using a different source are used (in the denominator) with the estimated total national cost (in the numerator) to obtain an estimated per person annual cost.

### 3 Results

#### 3.1 Community survey data: summary statistics

Of the 3057 patients recorded in the survey as being treated in the community for one or more complex wounds, 570 (18.7%) had a venous leg ulcer recorded as their primary (most severe) wound.

The average age of people with venous leg ulcers was 73.5 years old, with most patients being White British (92.6%) and living in owned/rented accommodation (88.9%) (Table 1). Amongst health-related variables: 54.2% of those with a venous leg ulcer could only walk with difficulty, on average patients had 1.95 wounds and 1.39 co-morbidities.

Table 1: Summary characteristics of 570 survey patients with venous leg ulcer as primary

|                                       | N   | % or mean     |
|---------------------------------------|-----|---------------|
| Sex (n=531):                          |     |               |
| Female                                | 288 | 54.2%         |
| Male                                  | 243 | 45.8%         |
| Age (years)                           | 562 | 73.52 (14.48) |
| Ethnicity (n=565):                    |     |               |
| White British                         | 523 | 92.6%         |
| Black, Asian or Minority Ethnic Group | 42  | 7.4%          |
| Residency (n=566):                    |     |               |
| Owned/rented                          | 503 | 88.9%         |
| Other                                 | 63  | 11.1%         |
| Mobility (n=563):                     |     |               |
| Walks freely                          | 305 | 41.9%         |
| Walks with difficulty                 | 236 | 54.2%         |
| Immobile                              | 22  | 3.9%          |
| Number of wounds                      | 570 | 1.95 (1.87)   |
| Number of co-morbidities              | 570 | 1.39 (1.13)   |
| Received most wound care (n=569):     |     |               |
| Non-clinical setting                  | 257 | 45.2%         |
| Clinical setting                      | 312 | 54.8%         |

Treatment and community staff ulcer-related resource use from the 570 patients whose primary wound was a venous leg ulcer is shown in Table 2. The most common primary dressing type used was non-antimicrobial (54.7%). Among antimicrobial dressings, silver-containing dressings were the most commonly used (14.6%). The majority of those with a venous leg ulcer were receiving some type of bandage (74.6%). 37.5% of patients were reported to be in receipt of venous leg ulcer medications, the

most commonly used was topic steroids (44.2% among those who had medication). Only one patient had no reported use of dressing, bandages, hosiery, medication nor community healthcare use. On average, patients received 1.9 visits per week from community nurses, lasting 34.9 minutes on average.

Table 2: Summary statistics of direct healthcare resource use amongst 570 survey patients with a venous leg ulcer as a primary wound

|                                 | N with this cost | % of total patients |
|---------------------------------|------------------|---------------------|
| <b>Primary Dressing:</b>        |                  |                     |
| Honey                           | 51               | 8.9                 |
| Iodine                          | 24               | 4.2                 |
| Silver                          | 83               | 14.6                |
| Other antimicrobial             | 36               | 6.3                 |
| Non-antimicrobial               | 312              | 54.7                |
| No dressing reported            | 64               | 11.2                |
| <b>Secondary Dressing:</b>      |                  |                     |
| Honey                           | 1                | 0.2                 |
| Silver                          | 5                | 0.9                 |
| Non-antimicrobial               | 250              | 43.9                |
| No dressing                     | 314              | 55.1                |
| Any secondary dressing reported | 260              | 45.6                |
| <b>Bandages:</b>                |                  |                     |
| No bandage reported             | 145              | 25.4                |
| 4 layer compression             | 52               | 9.1                 |
| Short stretch                   | 63               | 11.1                |
| 3 layer reduced compression     | 98               | 17.2                |
| 2 layer compression             | 82               | 14.4                |
| Non compression                 | 57               | 10.0                |
| Dressing retention              | 24               | 4.2                 |
| Other                           | 49               | 8.6                 |
| <b>Hosiery:</b>                 |                  |                     |
| No hosiery reported             | 464              | 81.4                |
| Class 1                         | 40               | 7.0                 |
| Class 2                         | 51               | 8.9                 |
| Class 3                         | 14               | 2.5                 |
| Other                           | 1                | 0.2                 |
| <b>Ulcer-related medicines:</b> |                  |                     |
| Antibiotic                      | 51               | 8.9                 |
| Topical steroids                | 88               | 15.4                |
| Analgesics                      | 60               | 10.5                |
| No medicines reported           | 371              | 65.1                |

### 3.2 Community Care Costs

Table 3 summarises the wound-related healthcare costs of 570 people with one or more venous leg ulcer over a two-week period. The mean, per person, community-based ulcer treatment cost was £147.19 (95% CI: £138.58 to £155.80). Community staff time was the most costly element, representing 70.9% of the total community care cost. Among costs not related to staff time, dressing and bandage use accounted for the largest proportions of the total cost at 14.1% and 13.0%, respectively.

Table 3: Community healthcare costs £ (2019 prices) of individual venous leg ulcer treatment over two weeks

| Cost component  | Mean £ (% of total) | SD      | 95% CI: Lower | 95% CI: Upper | 25 <sup>th</sup> Percentile | Median | 75 <sup>th</sup> Percentile |
|-----------------|---------------------|---------|---------------|---------------|-----------------------------|--------|-----------------------------|
| Dressing        | 20.76 (14.1)        | 13.52   | 19.64         | 21.87         | 12.82                       | 14.36  | 25.64                       |
| Bandages        | 19.19 (13.0)        | 19.06   | 17.62         | 20.76         | 0                           | 13.35  | 34.18                       |
| Hosiery         | 0.77 (0.5)          | 1.61    | 0.61          | 0.92          | 0                           | 0      | 0                           |
| Medication      | 2.31 (1.6)          | 3.63    | 2.01          | 2.61          | 0                           | 0      | 4.75                        |
| Community staff | 104.35 (70.9)       | 97.65   | 96.32         | 112.38        | 46.20                       | 81.5   | 127.70                      |
| All community   | 147.19              | 104.697 | 138.58        | 155.80        | 80.16                       | 120.03 | 179.49                      |

*Note:* We recoded one outlier of 62 nurse visits to the next highest value at 8 visits

### 3.3 Variation in Community Care Costs

We explored variation in the community care cost of treating a venous leg over a two-week period among 514 patients with complete information on covariates (Table 4). Treatment with a honey, silver or other antimicrobial primary dressing is associated with, on average, higher costs compared with use of a non-antimicrobial dressing. For example, use of a silver primary dressing is associated with a £65.27 (95% CI: £38.02 to £92.52) higher per-person cost on average than for people treated with a non-antimicrobial primary dressing. Patients who received most of their wound care in a clinic setting have £-44.91 (95% CI: -£64.68 to -£25.14) lower two-week community costs than people who received care in a non-clinic setting. For each extra reported wound, the patient has a higher average two weekly cost of £9.69 (95% CI: £4.06 to £15.33) associated with their venous leg ulcer. Those who walk with difficulty and those who are unable to walk have higher total costs of £37.75 (95% CI: £-8.50 to £84.01) and £20.25 (95% CI: £0.59 to £39.92), respectively, compared with those who can walk freely, although the latter difference is not statistically significant.

Table 4: Variation in total cost of venous leg ulcer treatment over a two-week period

|                                                                | Difference in GBP | 95% Confidence interval |
|----------------------------------------------------------------|-------------------|-------------------------|
| Dressing: Honey (ref=non-antimicrobial)                        | 18.59*            | (-2.52 to 39.69)        |
| Dressing: Iodine (ref=non-antimicrobial)                       | -11.78            | (-42.54 to 18.98)       |
| Dressing: Silver (ref=non-antimicrobial)                       | 65.27***          | (38.02 to 92.52)        |
| Dressing: Other antimicrobial (ref=non antimicrobial)          | 29.43*            | (-4.06 to 62.91)        |
| Dressing: Not reported (ref=non antimicrobial)                 | 8.98              | (-27.21 to 45.17)       |
| Any secondary dressing                                         | 9.38              | (-5.93 to 24.69)        |
| Any bandage use                                                | 48.63***          | (27.24 to 70.02)        |
| Any hosiery                                                    | -9.37             | (-31.34 to 12.61)       |
| Any medication                                                 | 24.76***          | (9.42 to 40.11)         |
| Most wound related care in clinical setting (ref=non-clinical) | -44.91***         | (-64.68 to -25.14)      |
| Female                                                         | -25.56            | (-64.53 to 13.40)       |
| Age (50-69 years old)                                          | -14.64            | (-50.43 to 21.15)       |
| Age (70-79 years old)                                          | -22.74            | (-57.19 to 11.71)       |
| Age (80+ years old)                                            | -39.33**          | (-74.02 to -4.64)       |
| Female*Age (50-69 years old)                                   | 32.93             | (-19.61 to 85.48)       |
| Female*Age (70-79 years old)                                   | 22.51             | (-24.05 to 69.07)       |
| Female*Age (80+ years old)                                     | 22.78             | (-21.01 to 66.56)       |
| White British (ref=other)                                      | 10.59             | (-15.54 to 36.72)       |
| Owned/ rented residence (ref=other)                            | -8.83             | (-36.39 to 18.73)       |
| Mobility: Walks with difficulty (ref=walks freely)             | 20.25**           | (0.59 to 39.92)         |
| Mobility: Immobile (ref=walks freely)                          | 37.75             | (-8.50 to 84.01)        |
| Number of wounds                                               | 9.69***           | (4.06 to 15.33)         |
| Number of co-morbidities                                       | 0.50              | (-6.12 to 7.11)         |
| Constant                                                       | 103.09***         | (50.79 to 155.39)       |
| N                                                              | 514               |                         |

Note: Coefficients estimated using ordinary least squares regression. \*p<0.1; \*\*p<0.05; \*\*\*p<0.01

### 3.4 Primary and Secondary Care Costs

Primary and secondary care costs add £19.20 to the total community care cost for all patients (Table 5). This results in a total mean two weekly per person healthcare (including primary and secondary care use) cost of £166.39 (95% CI: £157.78 to £175.00).

Table 5: healthcare costs £ (2019 prices) for venous ulcer treatment

| Cost component      | Mean £ (% of total) | SD     | CI: Lower | CI: Upper | 25 <sup>th</sup> Percentile | Median | 75 <sup>th</sup> Percentile |
|---------------------|---------------------|--------|-----------|-----------|-----------------------------|--------|-----------------------------|
| Primary & Secondary | 19.20 (20.65)       | -      | -         | -         | -                           | -      | -                           |
| Total healthcare    | 166.39              | 104.69 | 157.78    | 175.00    | 99.36                       | 139.23 | 198.69                      |

### 3.5 Extrapolation of Prevalence and Costs

The point prevalence of people with a venous leg ulcer in participating locales in the North West of England was 0.029% or 2.9 per 10 000 population (calculated as  $(570/1935683)*10000$ ) shown in Table 6 which is identical to the figure in Hall et al [15]. Application of this point prevalence estimate nationally suggests 19670 people are treated in the community for a venous leg ulcer in the UK at any point in time. If we assume the point prevalence is constant throughout the year but with different patients at each time point we obtain a theoretical maximum annual period prevalence of 75.6 per 10,000 population. This is an extreme assumption suggesting a theoretical incidence rate of 72.7 per 10,000 population, which is very high compared with a previously estimated incidence rate from THIN data of 10 per 10,000 population [21]. We combined the incidence rate from Petherick et al [21] with our data to derive an annual period prevalence estimate of 12.90 per 10 000 persons which is 5.8 times smaller than our maximum annual prevalence estimate. Our point prevalence increases from 2.9 to 3.2 per 10 000 population once we include those with any venous leg ulcer.

From our data we estimate the annual community cost of treating venous leg ulcers to be £75,477,680 for the UK. Including primary and secondary care costs increases the figure to £95,114,080. As noted above the corresponding annual prevalence figure for our annual costs can be no higher than 76.8 per 10000 persons. Calculating a per person annual cost which includes primary and secondary care using the incidence rate from Petherick et al [21] provides a cost of £4787.61.



Table 6: Prevalence and total estimated costs of people treated in the community for venous leg ulceration with extrapolation to National levels

|                                                                                     | National Level <sup>^*</sup> |
|-------------------------------------------------------------------------------------|------------------------------|
| <b>Prevalence (most severe wound):</b>                                              |                              |
| Point                                                                               | 2.9 per 10000 persons        |
| Annual (calculated with Petherick et al., [21] <sup>b</sup> incidence value)        | 12.9 per 10000 persons       |
| Annual (calculated using theoretical maximum incidence based on survey data)        | 76.8 per 10000 persons       |
| <b>Prevalence (any wound):</b>                                                      |                              |
| Point                                                                               | 3.2 per 10000                |
| Annual (calculated with Petherick et al., [21] <sup>b</sup> incidence value)        | 13.2 per 10000 persons       |
| Annual (calculated using theoretical maximum incidence based on survey data)        | 84.5 per 10000 persons       |
| <b>Annual Total Costs (most severe wound):</b>                                      |                              |
| Community based (based on assumed representativeness of survey data over 12 months) | £75,477,680                  |
| Per person (using annual prevalence calculated from Petherick et al [21] incidence) | £3799.21 <sup>a</sup>        |
| Per person (using annual prevalence calculated with maximum incidence assumption)   | £147.19 <sup>a</sup>         |
| Community + primary +secondary care                                                 | £95,114,080                  |
| Per person (Petherick et al [21] incidence as above )                               | £4787.61 <sup>a</sup>        |
| Per person (maximum prevalence)                                                     | £185.48 <sup>a</sup>         |

Note: <sup>^</sup>Assuming the point prevalence from the survey based on a population of 1 935 683 from nine North West community care trusts in England is representative of the rest of the UK. <sup>\*</sup>Based on the 2019 mid-year population estimate of the UK at 66,796,800 [20]. <sup>a</sup>Derived using the total cost in the numerator and the estimated number with a venous leg ulcer annually in the denominator. <sup>b</sup>Petherick et al [21] incidence rate is 10 per 10 000 persons

#### 4 Discussion

To date there has been limited use of community-collected information to inform service level cost estimates of treating venous leg ulcers. Our cost-of-illness analysis addresses this gap in the literature. We extend the coverage of our community-sourced resource use and cost data with inclusion of primary and secondary care resource use to obtain a more complete figure on direct healthcare costs.

The average two-week per person cost of treating a venous leg ulceration was estimated as £166.39 (95% CI: £157.78 to £175.00) with community staff time making up over half this total. Using community data only, estimated annual costs were higher where anti-microbial dressings were used and where wound care was delivered in the home. We can draw limited conclusions about the contribution of these factors to increased costs as people with more serious and slower to heal wounds may be more likely to receive care at home and/or anti-microbial dressings. However there is currently no clear



1  
2  
3 evidence of benefit associated with the use of silver or any other antimicrobial dressings [18,19].  
4 Likewise, treatment delivered in clinics where possible, rather than in patient homes, likely offers  
5 savings in terms of staff time but it is also likely the least complex patients seen in clinic settings. Patient  
6 characteristics such as age, mobility and the numbers of wounds were also associated with variation in  
7 the total cost.  
8  
9  
10

11 Our point prevalence of 2.9 per 10,000 population triangulates well with other studies that also use  
12 regional UK data. For example, the figure is identical to the 2.9 (95% CI: 2.5 to 3.3) per 10 000  
13 population from Hall et al [15]. This study used a similar protocol but in different areas of the UK with  
14 different staff and was undertaken some years earlier. Hall et al [15] also included those receiving care  
15 in acute settings in their figures. An older study which used THIN data from 2001 to 2006 estimated  
16 an annual prevalence of 8.28 per 10 000 (95% CI 8.17 to 8.39) person years and 14.07 (95% CI: 8.17  
17 to 8.39) per 10 000 person years from the same time period using the General Practice Research  
18 Database [21]. Our results are robust to the inclusion of those with a venous leg ulcer that is not their  
19 most severe wound, increasing the point prevalence by 0.3 to 3.2 per 10,000 population.  
20  
21  
22  
23  
24  
25  
26

27 We were unable to estimate an annual period prevalence figure from our point prevalence estimate  
28 because we lacked contemporaneous incidence and duration data. However we could use our data to  
29 suggest that the annual prevalence of people with venous leg ulceration *can be no greater than* 75.6 per  
30 10,000 population (using incidence rates reported in the literature). The annual prevalence of 59 per  
31 10,000 population (assumed to mean 59 people not 59 ulcers) reported by Guest et al [7], is below our  
32 maximum annual prevalence, but still very high given the extreme incidence of leg ulceration that would  
33 be required to achieve these figures. Both estimates assume an incidence rate far in excess of those  
34 found in the literature using THIN data at 14 per 10,000 population [21]. Guest et al. [7] also reported  
35 an additional 85 per 10,000 population has having an unspecified leg ulcer. If we assume that at least  
36 60% of Guest's unspecified leg ulcers are venous leg ulcers then the annual prevalence is increased to  
37 110 per 10,000 annually: our data questions the validity of such high values.  
38  
39  
40  
41  
42  
43  
44

45 We estimate a national annual cost attributable to treating venous leg ulcers of £95.11 million; an  
46 estimate that is only 15.9% of the £596.55 million reported by Guest et al [8] as the lower end of their  
47 estimate (with an upper estimate of £921.94 million). Our estimated per-person annual cost of a venous  
48 leg at £4787.61, which uses the incidence rate of Petherick et al [21], is 62.6% of the equivalent cost  
49 obtained by Guest et al [7] at £7615.03. Key differences are that Guest et al [7,8] used information from  
50 a GP based dataset that included a study population of 505 selected from a random sample of 6000  
51 patients in the THIN database. By contrast, we used a bottom-up approach to costing, using information  
52 from audits of all patients treated by participating NHS organisations. The costing method of Guest et  
53 al [7] compared the costs of 505 venous leg ulcer patients to those without a venous leg ulcer to obtain  
54 the incremental cost. Importantly our cost components were similar to those of Guest et al [7], and we  
55  
56  
57  
58  
59  
60

1  
2  
3 agree that community staff time is the largest component of the total cost. Guest et al [7] also considered  
4 the cost of care delivered once people's ulcers had healed. This may explain some of the differences in  
5 cost although ulcer-related care in the absence of an actual wound is likely to be limited. A cost for the  
6 direct management of venous leg ulcers has also been obtained using GP data obtained from Wales over  
7 an 11 year period (2007 to 2017) this estimated a cost of £7706 per patient per annum [23]. The work  
8 notes that as nursing data were not available this was estimated for the study, and then reported as the  
9 main cost drive in the results. The value of the work presented here is that empirical community nursing  
10 data informed the estimates. It is not clear from this study what prevalence estimates were used to  
11 extrapolate to UK costs that are presented.  
12  
13

14  
15  
16  
17  
18 Our study has some limitations, in that we only considered the costs associated with bandages and  
19 dressings for the primary wound and we assumed all recorded visits were with a nurse. Recording of  
20 ulcer-related staff time may be overestimated if the healthcare profession did not distinguish between  
21 visits that were for care of the primary wound and no other wounds or co-morbidities. Even so, if the  
22 healthcare professionals in our questionnaire could not separate venous leg ulcer specific care time and  
23 treatment from other patient co-morbidities then our cost is likely to be over-estimated and move further  
24 closer to estimates in the literature. There is little information on travel time by nurses and current  
25 reimbursement based on distance; therefore, we used old rates of reimbursement per visit. A further  
26 limitation is that we only had direct healthcare resource use to use for costing. Other direct costs such  
27 as surgery and indirect costs such as productivity loss were not available. However, there is little  
28 representative information about wound care in a community setting in general and we note these as  
29 future areas to obtain cost information.  
30  
31  
32  
33  
34  
35  
36  
37

38 Leg ulcer care is costly to the NHS but we suggest it may not be as costly as has been claimed in  
39 previous highly cited and influential work [7,8,22]. There are difficulties in comparing the available  
40 data from different sources, in part due to a lack of information on methods used and further  
41 transparency may allow differences in figures to be better understood. Fundamentally, our ability to  
42 estimate costs, scrutinise the quality of care and observe links between care and outcomes in wound  
43 care is hampered by a lack of routinely collection and useable information in community services. The  
44 absence of a clinical database for community wound care also hinders clinical communication and  
45 monitoring of patient progress. An accurate picture of the cost and prevalence of venous leg ulcers,  
46 which we have aimed to provide in this study, can be used to further understand the cost and scale of  
47 wound care and a basis from which to more realistically estimate the scale of potential savings.  
48  
49  
50  
51  
52  
53  
54  
55  
56  
57  
58  
59  
60

### References

- 1 Franks PJ, Morgan PA. Health-related quality of life with chronic leg ulceration. *Expert Review of Pharmacoeconomics & Outcomes Research* 2014
- 2 Green J, Jester R, McKinley R, *et al.* The impact of chronic venous leg ulcers: a systematic review. *J Wound Care* 2014;**23**:601–12. doi:10.12968/jowc.2014.23.12.601
- 3 Gray TA, Rhodes S, Atkinson RA, *et al.* Opportunities for better value wound care: a multiservice, cross-sectional survey of complex wounds and their care in a UK community population. *BMJ Open* 2018;**8**:e019440. doi:10.1136/bmjopen-2017-019440
- 4 Bennett G, Dealey C, Posnett J. The cost of pressure ulcers in the UK. *Age Ageing* 2004;**33**:230–5. doi:10.1093/ageing/afh086
- 5 Rice DP. Cost of illness studies: what is good about them? *Injury Prevention* 2000;**6**:177–9. doi:10.1136/ip.6.3.177
- 6 Onukwugha E, McRae J, Kravetz A, *et al.* Cost-of-Illness Studies: An Updated Review of Current Methods. *PharmacoEconomics* 2016;**34**:43–58. doi:10.1007/s40273-015-0325-4
- 7 Guest JF, Fuller GW, Vowden P. Venous leg ulcer management in clinical practice in the UK: costs and outcomes. *International Wound Journal* 2018;**15**:29–37. doi:10.1111/iwj.12814
- 8 Guest JF, Ayoub N, McIlwraith T, *et al.* Health economic burden that different wound types impose on the UK's National Health Service. *International Wound Journal* 2017;**14**:322–30. doi:10.1111/iwj.12603
- 9 Ashby RL, Gabe R, Ali S, *et al.* VenUS IV (Venous leg Ulcer Study IV) - compression hosiery compared with compression bandaging in the treatment of venous leg ulcers: a randomised controlled trial, mixed-treatment comparison and decision-analytic model. *Health Technol Assess* 2014;**18**:1–293, v–vi. doi:10.3310/hta18570
- 10 Costa N, Derumeaux H, Rapp T, *et al.* Methodological considerations in cost of illness studies on Alzheimer disease. *Health Econ Rev* 2012;**2**:18. doi:10.1186/2191-1991-2-18
- 11 Molinier L, Bauvin E, Combescure C, *et al.* Methodological Considerations in Cost of Prostate Cancer Studies: A Systematic Review. *Value in Health* 2008;**11**:878–85. doi:10.1111/j.1524-4733.2008.00327.x
- 12 Larg A, Moss JR. Cost-of-illness studies. *Pharmacoeconomics* 2011;**29**:653–671.
- 13 Chan B, Cadarette S, Wodchis W, *et al.* Cost-of-illness studies in chronic ulcers: a systematic review. *Journal of Wound Care* 2017;**26**:S4–14. doi:10.12968/jowc.2017.26.Sup4.S4
- 14 Mairghani M, Jassim G, Elmusharaf K, *et al.* Methodological approaches for assessing the cost of diabetic foot ulcers: a systematic literature review. *Journal of Wound Care* 2019;**28**:261–6. doi:10.12968/jowc.2019.28.5.261
- 15 Hall J, Buckley HL, Lamb KA, *et al.* Point prevalence of complex wounds in a defined United Kingdom population. *Wound Repair and Regeneration* 2014;**22**:694–700. doi:10.1111/wrr.12230
- 16 Joint Formulary Committee *British National Formulary*. Available at <http://www.medicinescomplete.com>. (accessed 24 Jun 2020).

- 1  
2  
3 17 Curtis LA, Burns A. *Unit Costs of Health and Social Care 2019*. Kent, UK: PSSRU 2019.  
4 <https://doi.org/10.22024/UniKent/01.02.79286> (accessed 30 Mar 2020).  
5  
6 18 Scottish Intercollegiate Guidelines Network. *Management of chronic venous leg ulcers: a*  
7 *national clinical guideline*. Edinburgh: : Scottish Intercollegiate Guidelines Network 2010.  
8  
9 19 Hussey L, Stocks SJ, Wilson P, *et al*. Use of antimicrobial dressings in England and the  
10 association with published clinical guidance: interrupted time series analysis. *BMJ Open*  
11 2019;**9**:e028727. doi:10.1136/bmjopen-2018-028727  
12  
13 20 ONS. Population estimates for the UK, England and Wales, Scotland and Northern Ireland,  
14 provisional.  
15 [https://www.ons.gov.uk/peoplepopulationandcommunity/populationandmigration/populationesti](https://www.ons.gov.uk/peoplepopulationandcommunity/populationandmigration/populationestimates/bulletins/annualmidyearpopulationestimates/mid2019)  
16 [mates/bulletins/annualmidyearpopulationestimates/mid2019](https://www.ons.gov.uk/peoplepopulationandcommunity/populationandmigration/populationestimates/bulletins/annualmidyearpopulationestimates/mid2019) (accessed 18 May 2020).  
17  
18 21 Petherick ES, Pickett KE, Cullum NA. Can different primary care databases produce comparable  
19 estimates of burden of disease: results of a study exploring venous leg ulceration. *Family Practice*  
20 2015;**;**cmv013. doi:10.1093/fampra/cmv013  
21  
22 22 Guest JF, Ayoub N, McIlwraith T, *et al*. Health economic burden that wounds impose on the  
23 National Health Service in the UK. *BMJ Open* 2015;**5**:e009283. doi:10.1136/bmjopen-2015-  
24 009283  
25  
26 23 Phillips CJ, Humphreys I, Thayer D, *et al*. Cost of managing patients with venous leg ulcers. *Int*  
27 *Wound J*, 2020; 17, 1074-1082  
28  
29 24 Curtis, L. Unit Costs of Health and Social Care 2010, Personal Social Services Research Unit,  
30 University of Kent, Canterbury. [https://www.pssru.ac.uk/project-pages/unit-costs/unit-costs-](https://www.pssru.ac.uk/project-pages/unit-costs/unit-costs-2010/)  
31 [2010/](https://www.pssru.ac.uk/project-pages/unit-costs/unit-costs-2010/) (accessed 30 March 2020).  
32  
33  
34  
35  
36

37 **Contributors:** NC and JD conceived the idea for the overall project; all authors contributed to the study  
38 design; SU was responsible for data analysis, all authors contributed to data analysis. SU created the  
39 original draft of the manuscript. All authors contributed to the interpretation of study findings, critical  
40 revision of the manuscript for important intellectual content and approval of the final manuscript.  
41  
42

43 **Funding statement** This work was supported by Innovate UK grant number 104546  
44

45 **Competing interests** None declared  
46

47 **Disclaimer: To add**  
48

49 **Ethics approval: Not required**  
50

51 **Data sharing statement** No additional data are available  
52  
53  
54  
55  
56  
57  
58  
59  
60

## Appendix

Table A1: Assigned unit costs

| Resource use item            | Cost (2019 prices)                | Source                         |
|------------------------------|-----------------------------------|--------------------------------|
| <b>Dressings:</b>            |                                   |                                |
| Honey                        | £5.89                             | Joint Formulary Committee [16] |
| Iodine                       | £0.41                             | Joint Formulary Committee [16] |
| Silver                       | £9.38                             | Joint Formulary Committee [16] |
| Other anti-microbial         | £5.80                             | Joint Formulary Committee [16] |
| Non anti-microbial           | £3.41                             | Joint Formulary Committee [16] |
| <b>Hosiery:</b>              |                                   |                                |
| Class 1                      | £23.92                            | Joint Formulary Committee [16] |
| Class 2                      | £23.99                            | Joint Formulary Committee [16] |
| Class 3                      | £29.04                            | Joint Formulary Committee [16] |
| Other                        | £29.75                            | Joint Formulary Committee [16] |
| <b>Bandages:</b>             |                                   |                                |
| 4 layer compression          | £9.29                             | Joint Formulary Committee [16] |
| Short stretch                | £3.55                             | Joint Formulary Committee [16] |
| 3 layer reduced compression  | £5.08                             | Joint Formulary Committee [16] |
| 2 layer compression          | £9.09                             | Joint Formulary Committee [16] |
| Non compression              | £1.79                             | Joint Formulary Committee [16] |
| Dressing retention           | £0.35                             | Joint Formulary Committee [16] |
| Other                        | £17.32                            | Joint Formulary Committee [16] |
| <b>Medication:</b>           |                                   |                                |
| Analgesics                   | £7.76                             | Joint Formulary Committee [16] |
| Topical Steroids             | £4.75                             | Joint Formulary Committee [16] |
| Pentoxifylline               | £13.68                            | Joint Formulary Committee [16] |
| Antibiotics                  | £4.94                             | Joint Formulary Committee [16] |
| <b>Healthcare use:</b>       |                                   |                                |
| Nurse visit use (home based) | £46 per hour                      | PSSRU Unit Costs 2019 [17]     |
|                              | £1.50 travel cost per visit       | PSSRU Unit Costs 2010 [24]     |
| Nurse, GP, Outpatient and    | £998.31 (applied to all patients) | VenUs IV trial [9]             |

**STROBE 2007 (v4) Statement—Checklist of items that should be included in reports of *cross-sectional studies***

| Section/Topic                | Item # | Recommendation                                                                                                                                                                       | Reported on page # |
|------------------------------|--------|--------------------------------------------------------------------------------------------------------------------------------------------------------------------------------------|--------------------|
| <b>Title and abstract</b>    | 1      | (a) Indicate the study's design with a commonly used term in the title or the abstract                                                                                               | 1                  |
|                              |        | (b) Provide in the abstract an informative and balanced summary of what was done and what was found                                                                                  | 2                  |
| <b>Introduction</b>          |        |                                                                                                                                                                                      |                    |
| Background/rationale         | 2      | Explain the scientific background and rationale for the investigation being reported                                                                                                 | 4,5                |
| Objectives                   | 3      | State specific objectives, including any prespecified hypotheses                                                                                                                     | 5                  |
| <b>Methods</b>               |        |                                                                                                                                                                                      |                    |
| Study design                 | 4      | Present key elements of study design early in the paper                                                                                                                              | 5                  |
| Setting                      | 5      | Describe the setting, locations, and relevant dates, including periods of recruitment, exposure, follow-up, and data collection                                                      | 5 & 6              |
| Participants                 | 6      | (a) Give the eligibility criteria, and the sources and methods of selection of participants                                                                                          | 5 & 6              |
| Variables                    | 7      | Clearly define all outcomes, exposures, predictors, potential confounders, and effect modifiers. Give diagnostic criteria, if applicable                                             | 5 & 6              |
| Data sources/<br>measurement | 8*     | For each variable of interest, give sources of data and details of methods of assessment (measurement). Describe comparability of assessment methods if there is more than one group | 5 & 6              |
| Bias                         | 9      | Describe any efforts to address potential sources of bias                                                                                                                            | -                  |
| Study size                   | 10     | Explain how the study size was arrived at                                                                                                                                            | 6                  |
| Quantitative variables       | 11     | Explain how quantitative variables were handled in the analyses. If applicable, describe which groupings were chosen and why                                                         | 5 & 6 & 7          |
| Statistical methods          | 12     | (a) Describe all statistical methods, including those used to control for confounding                                                                                                | 5 & 6 & 7          |
|                              |        | (b) Describe any methods used to examine subgroups and interactions                                                                                                                  | 7                  |
|                              |        | (c) Explain how missing data were addressed                                                                                                                                          | 6                  |
|                              |        | (d) If applicable, describe analytical methods taking account of sampling strategy                                                                                                   | -                  |
|                              |        | (e) Describe any sensitivity analyses                                                                                                                                                | 7                  |
| <b>Results</b>               |        |                                                                                                                                                                                      |                    |

|                          |     |                                                                                                                                                                                                              |         |
|--------------------------|-----|--------------------------------------------------------------------------------------------------------------------------------------------------------------------------------------------------------------|---------|
| Participants             | 13* | (a) Report numbers of individuals at each stage of study—eg numbers potentially eligible, examined for eligibility, confirmed eligible, included in the study, completing follow-up, and analysed            | 7 & 9   |
|                          |     | (b) Give reasons for non-participation at each stage                                                                                                                                                         | 8       |
|                          |     | (c) Consider use of a flow diagram                                                                                                                                                                           | -       |
| Descriptive data         | 14* | (a) Give characteristics of study participants (eg demographic, clinical, social) and information on exposures and potential confounders                                                                     | 8 & 9   |
|                          |     | (b) Indicate number of participants with missing data for each variable of interest                                                                                                                          | -       |
| Outcome data             | 15* | Report numbers of outcome events or summary measures                                                                                                                                                         | 9       |
| Main results             | 16  | (a) Give unadjusted estimates and, if applicable, confounder-adjusted estimates and their precision (eg, 95% confidence interval). Make clear which confounders were adjusted for and why they were included | -       |
|                          |     | (b) Report category boundaries when continuous variables were categorized                                                                                                                                    | -       |
|                          |     | (c) If relevant, consider translating estimates of relative risk into absolute risk for a meaningful time period                                                                                             | -       |
| Other analyses           | 17  | Report other analyses done—eg analyses of subgroups and interactions, and sensitivity analyses                                                                                                               | 11      |
| <b>Discussion</b>        |     |                                                                                                                                                                                                              |         |
| Key results              | 18  | Summarise key results with reference to study objectives                                                                                                                                                     | 12      |
| Limitations              | 19  | Discuss limitations of the study, taking into account sources of potential bias or imprecision. Discuss both direction and magnitude of any potential bias                                                   | 13      |
| Interpretation           | 20  | Give a cautious overall interpretation of results considering objectives, limitations, multiplicity of analyses, results from similar studies, and other relevant evidence                                   | 12 & 13 |
| Generalisability         | 21  | Discuss the generalisability (external validity) of the study results                                                                                                                                        | 12      |
| <b>Other information</b> |     |                                                                                                                                                                                                              |         |
| Funding                  | 22  | Give the source of funding and the role of the funders for the present study and, if applicable, for the original study on which the present article is based                                                | 16      |

\*Give information separately for cases and controls in case-control studies and, if applicable, for exposed and unexposed groups in cohort and cross-sectional studies.

**Note:** An Explanation and Elaboration article discusses each checklist item and gives methodological background and published examples of transparent reporting. The STROBE checklist is best used in conjunction with this article (freely available on the Web sites of PLoS Medicine at <http://www.plosmedicine.org/>, Annals of Internal Medicine at <http://www.annals.org/>, and Epidemiology at <http://www.epidem.com/>). Information on the STROBE Initiative is available at [www.strobe-statement.org](http://www.strobe-statement.org).



# BMJ Open

## The health service costs of treating venous leg ulcers in the UK: evidence from a cross-sectional survey based in the north west of England

|                                 |                                                                                                                                                                                                                                                                                                               |
|---------------------------------|---------------------------------------------------------------------------------------------------------------------------------------------------------------------------------------------------------------------------------------------------------------------------------------------------------------|
| Journal:                        | <i>BMJ Open</i>                                                                                                                                                                                                                                                                                               |
| Manuscript ID                   | bmjopen-2021-056790.R1                                                                                                                                                                                                                                                                                        |
| Article Type:                   | Original research                                                                                                                                                                                                                                                                                             |
| Date Submitted by the Author:   | 15-Nov-2021                                                                                                                                                                                                                                                                                                   |
| Complete List of Authors:       | Urwin, Sean; University of Manchester, Health Organisation, Policy and Economics<br>Dumville, Jo C.; The University of Manchester,<br>Sutton, Matt; University of Manchester,<br>Cullum, Nicky; The University of Manchester, School of Health Sciences;<br>Manchester University NHS Foundation Trust, MAHSC |
| <b>Primary Subject Heading</b>: | Health economics                                                                                                                                                                                                                                                                                              |
| Secondary Subject Heading:      | Nursing, Epidemiology                                                                                                                                                                                                                                                                                         |
| Keywords:                       | HEALTH ECONOMICS, WOUND MANAGEMENT, EPIDEMIOLOGY                                                                                                                                                                                                                                                              |
|                                 |                                                                                                                                                                                                                                                                                                               |

SCHOLARONE™  
Manuscripts





I, the Submitting Author has the right to grant and does grant on behalf of all authors of the Work (as defined in the below author licence), an exclusive licence and/or a non-exclusive licence for contributions from authors who are: i) UK Crown employees; ii) where BMJ has agreed a CC-BY licence shall apply, and/or iii) in accordance with the terms applicable for US Federal Government officers or employees acting as part of their official duties; on a worldwide, perpetual, irrevocable, royalty-free basis to BMJ Publishing Group Ltd ("BMJ") its licensees and where the relevant Journal is co-owned by BMJ to the co-owners of the Journal, to publish the Work in this journal and any other BMJ products and to exploit all rights, as set out in our [licence](#).

The Submitting Author accepts and understands that any supply made under these terms is made by BMJ to the Submitting Author unless you are acting as an employee on behalf of your employer or a postgraduate student of an affiliated institution which is paying any applicable article publishing charge ("APC") for Open Access articles. Where the Submitting Author wishes to make the Work available on an Open Access basis (and intends to pay the relevant APC), the terms of reuse of such Open Access shall be governed by a Creative Commons licence – details of these licences and which [Creative Commons](#) licence will apply to this Work are set out in our licence referred to above.

Other than as permitted in any relevant BMJ Author's Self Archiving Policies, I confirm this Work has not been accepted for publication elsewhere, is not being considered for publication elsewhere and does not duplicate material already published. I confirm all authors consent to publication of this Work and authorise the granting of this licence.

1  
2  
3 **The health service costs of treating venous leg ulcers in the UK: evidence from a cross-**  
4 **sectional survey based in the north west of England**  
5  
6  
7

8  
9 Authors: Sean Urwin, Jo Dumville, Matt Sutton, Nicky Cullum

10 Sean Urwin, PhD Student in Health Economics, Health organisation, Policy and Economics,  
11 Williamson Building, University of Manchester, Oxford Road, Manchester, M13 9PL, UK  
12  
13

14  
15 Jo Dumville, Professor of Applied Health Research, Division of Nursing, Midwifery and Social  
16 Work, Manchester Academic Health Science Centre, Jean McFarlane Building, University of  
17 Manchester, Oxford Road, Manchester, M13 9PL, UK  
18  
19

20  
21  
22 Matt Sutton, Professor of Health Economics, Health organisation, Policy and Economics, Williamson  
23 Building, University of Manchester, Oxford Road, Manchester, M13 9PL, UK  
24  
25

26  
27 Nicky Cullum, Professor of Nursing, Division of Nursing, Midwifery and Social Work, Manchester  
28 Academic Health Science Centre, Jean McFarlane Building, University of Manchester, Oxford Road,  
29 Manchester, M13 9PL, UK  
30  
31

32 Corresponding Author:

33  
34 Sean Urwin [sean.urwin@manchester.ac.uk](mailto:sean.urwin@manchester.ac.uk)  
35  
36

37 **Word Count:** 4445  
38

39 **Keywords:** health economics, wound management, epidemiology, cost of illness, ulcers,  
40 wounds  
41  
42  
43  
44  
45  
46  
47  
48  
49  
50  
51  
52  
53  
54  
55  
56  
57  
58  
59  
60

## Abstract

**Objectives:** To estimate and examine the direct healthcare costs of treating people with open venous leg ulcers in the UK.

**Design:** Cost-of-illness study

**Setting:** A cross-sectional survey of nine NHS community locales over two-week periods in 2015/2016

**Methods:** We examined the resource use and prevalence of venous leg ulcer treatment in the community. Examination of variation in these obtained costs was performed by ordinary least squares regression. We used additional resource use information from a randomised control trial and extrapolated costs to the UK for an annual period.

**Results:** The average two-week per person cost of treating patients where a venous leg ulceration was the primary (most severe) wound was estimated at £166.39 (95% CI: £157.78 to £175.00) with community staff time making up over half of this amount. Costs were higher where anti-microbial dressings were used and where wound care was delivered in the home. Among all those with any recorded venous leg ulcer (primary and non-primary), we derived a point prevalence of 3.2 per 10,000 population and estimated that the annual prevalence could be no greater than 84.5 per 10,000 population. We estimated that the national cost of treating a venous leg ulcer was £102 million with a per person annual cost at £4787.70.

**Conclusion:** Our point prevalence figures are in line with the literature. However, our annual prevalence estimations and costs are far lower than those reported in recent literature which suggests that the costs of treating venous leg ulcers are lower than previously thought. Movement towards routinely collected and useable community care activity would help provide a transparent and deeper understanding of the scale and cost of wound care in the UK.

### Strengths and limitations of this study

We use contemporary data collected from NHS community services where most venous leg ulcer wound care is delivered in the UK.

We have applied rigorous and transparent cost of illness methodology

We have isolated the direct healthcare cost associated with the treatment of venous leg ulcers in this multimorbid patient population.

We assume the nine surveyed locales are representative of the rest of the UK in terms of venous leg ulcer prevalence and community-related treatment cost.

## 1. Introduction

Venous leg ulcers are open wounds that are relatively common in older people. These wounds result from impaired blood flow in damaged or diseased leg veins, leading to complex physiological changes that result in skin breakdown and poor healing. Venous leg ulcers are typically long lasting, have a high risk of recurrence and a negative impact on health related quality of life [1,2]. In the UK, complex wounds, of which venous leg ulcers are the most common type, are mainly treated in the community by nursing teams [3,4].

Cost-of-illness studies of particular health conditions can provide useful support for service planning. Cost is an important metric as it can: quantify the scale of a condition or illness in monetary terms; justify interventions and policy focus; assist in the allocation of resources to the management of different conditions and provide the basis for an economic evaluation [5]. Analysis of the variation in a cost-of-illness by sub-groups is an informative feature of these studies of interest to public health decision makers [6].

One set of estimates of the cost to the NHS of managing people with venous leg ulcers have been widely used and have contributed to the development of a national wound care strategy. These estimates were based on routinely collected primary care data (The Health Improvement Network (THIN) database) [7]. The mean cost (of staff time and wound care) of a venous leg ulcer per annum was estimated as £7600 in the UK at 2015/16 prices with community nursing time accounting for 78% of this cost [7]. Also using primary care data the annual cost (of staff time and treatments) of venous leg ulcer care attributable to the NHS in the UK was reported as £941 million, with a further £836 million attributable to unspecified leg ulcers [8].

Whilst routinely collected primary care data may provide a useful insight into the cost of managing venous leg ulcers, there are potential limitations. Primary care data may not capture all community-based activity (e.g., community nursing care) and it is challenging to separate wound-related care activity from activity related to co-morbidities. It is crucial to obtain costs we are confident are incurred due to the venous leg ulcer (the incremental cost); so that we can calculate the costs that could be reduced if a venous leg ulcer is prevented or healed.

Alternative data with which to explore the cost of venous leg ulcers to the health service are those from community nursing teams directly, supplemented by information about primary and secondary care resource use. Availability of these data is generally limited, with historically low use of electronic records and a lack of standardised data collection in community health care. Collection of 'real world data' from the community on resource use associated with venous leg ulcer care offers a desirable addition to the knowledge base on wound care costs.

1  
2  
3 We have three aims in this paper. Firstly, to estimate the direct healthcare costs of treating people with  
4 open venous leg ulcers, using survey data collected from NHS organisations in the North West of  
5 England. We combine our survey data with healthcare data from a community-focused, pragmatic  
6 randomised control trial involving people with venous leg ulcers [9] which included estimates of  
7 healthcare use from hospital and primary care providers. Second, we examine whether, and to what  
8 extent, patient and wound-related characteristics are associated with differences in the community costs  
9 of venous leg ulcer treatment, as there is little evidence on this currently available. Third, we extrapolate  
10 the direct care costs of venous leg ulcers to the whole of the UK.  
11  
12  
13  
14  
15  
16  
17

## 18 **2 Methods**

### 19 **2.1 Study Design and Data**

20  
21 We performed a cost-of-illness study of venous leg ulcer treatment from the healthcare provider (NHS)  
22 perspective, including only direct healthcare costs. We used a ‘bottom up’ costing methodology and  
23 took a prevalence-based approach. We followed the guidance on reporting for cost-of-illness studies  
24 provided by Costa et al [10], Molinier et al [11], and Larg and Moss [12]. Further, we referred to  
25 systematic reviews of cost-of-illness studies of wound care to ensure we reported the key components  
26 relevant to the costing of wounds [13,14].  
27  
28  
29  
30

31  
32 We obtained resource use and prevalence data from cross-sectional surveys covering two-week periods  
33 in June/August 2015 in four community NHS locales and in July 2016 in a further five NHS community  
34 locales. The two-week data collection periods enabled community healthcare professionals to record  
35 resource use once for each patient on their caseload. The strategy of data collection was based on a  
36 previous study conducted in the city of Leeds, England [15].  
37  
38  
39  
40

41 For this survey, one study form was completed for each person treated for a complex wound (including  
42 those with venous leg ulcers) by NHS community services during each two-week survey. The form  
43 captured data about each service user’s current wound and its care (see [3] for full details of survey  
44 methods); focusing on treatments directly related to each person’s primary (most severe) wound at that  
45 time (as judged by the healthcare professional completing the form). Our cost-of-illness estimate used  
46 patient level data only from people whose primary (most severe) wound was a venous leg ulcer. The  
47 survey also asked about the number of nurse visits per week for ulcer care and the duration of these  
48 visits. Each survey questionnaire was completed by the NHS health professional who had the most  
49 contact with the patient for ulcer-related care. The survey was anonymised and completed away from  
50 the ‘bedside’ with no direct input from the patient.  
51  
52  
53  
54  
55  
56

57 The survey only collected data on community activity, so we used primary and secondary care resource  
58 use data from another important research source, VenUS IV [9]. This pragmatic trial compared two  
59  
60

1  
2  
3 forms of compression treatment for people with one or more venous leg ulcer. The study performed a  
4 full economic analysis and as part of this, every three months for a maximum of 12 months, participants  
5 reported ulcer-related use of NHS services. We used the trial data to estimate typical resource use/costs  
6 of ulcer-related visits to the GP (surgery and home visits), practice nurse, hospital outpatient  
7 appointments (with a doctor or nurse) and hospital admissions (either day case or longer stays).  
8  
9

10  
11  
12 The combination of community activity from the survey and primary and secondary care costs from the  
13 trial ensured representation of all relevant resource use in the cost calculations for ulcer treatment.  
14  
15

## 16 **2.2 Community Care Costs**

17  
18 We costed five elements of resource used from the survey data: all dressings, all bandages, hosiery,  
19 medication, and staff time. We assumed that: dressings and bandages were changed at every visit by a  
20 community nurse, with the number of visits based on the average number of community nurse visits  
21 (derived from the survey data). Where compression hosiery was recorded, we assumed use of a single  
22 hosiery kit for three months (or two in six months) and medication costs were for every two weeks. We  
23 applied a cost of zero if dressing, bandage, hosiery, medication or community healthcare use  
24 information was not recorded in the survey as we assumed the patient had not been treated with these.  
25  
26  
27  
28  
29

30 Average costs for dressings, hosiery, bandage and medication were obtained using unit costs from the  
31 British National Formulary [16] (shown in appendix Table A1). We took the number and duration of  
32 community nurse visits directly from the survey and applied the hourly unit cost (from the mean of  
33 wage bands 5 to 7) from Personal Social Services Research Unit (PSSRU) unit costs at 2019 [17]. We  
34 included travel time associated with a nurse visit only if the patient received most of their hands-on  
35 wound care in a non-clinical setting (i.e. not in a community/clinic/health centre/GP practice) using  
36 information from the 2010 Personal Social Services Research Unit (PSSRU) unit costs [18]. We did not  
37 have information on travel distances and therefore costed travel time on a per-visit basis.  
38  
39  
40  
41  
42

43 We calculated the mean two-week community-associated health service cost of treating an individual's  
44 venous leg ulcer by summing dressing, hosiery, bandage, medication and staff costs at 2019 prices. The  
45 focus was over two weeks as this was the period of time over which the survey was conducted and  
46 where weekly values were reported (e.g., number of clinic visits per week), we multiplied them by two.  
47  
48  
49  
50

## 51 **2.3 Variation in Community Care Costs**

52  
53 We explored whether, and to what degree, patient characteristics (age, sex, number of wounds, number  
54 of co-morbidities, ethnic group, patient mobility and location of most care delivery) and patient receipt  
55 of different resources (type of primary dressing, any secondary dressing use, bandage use and hosiery  
56 use) were associated with variations in the total two-week community care cost. Variation in the total  
57 cost by dressing type is of relevance as there is current uncertainty about the clinical effectiveness of  
58  
59  
60

1  
2  
3 antimicrobial dressings, which also have a higher unit cost than non-antimicrobial dressings. Further,  
4 current guidelines do not recommend the use of antimicrobial dressings [19] but there has been  
5 increased annual expenditure on this dressing type [20]. We identify variation in the cost of a venous  
6 leg ulcer derived from our survey data via ordinary least squares regression. We include patients with  
7 complete information on patient characteristics and who also have a cost recorded for one out of the  
8 four cost components.  
9  
10  
11  
12

## 13 **2.4 Primary and Secondary Care Costs**

14  
15 Primary and secondary care cost information was taken as a per participant cost directly from values  
16 calculated in VenUS IV [9]. This was a cost of £998.31 per participant inflated to 2019 prices using the  
17 NHS pay and prices cost inflation index from £907.60 [17] and divided to obtain a per two-week cost.  
18  
19  
20

## 21 **2.5 Extrapolation of prevalence to a national level**

22  
23 To calculate a national point prevalence for people in the community being treated for venous leg  
24 ulceration we first divided the number of those with a venous leg ulcer (including all venous leg ulcers  
25 whether they were the primary (most severe) wound or not) in the survey with the total population  
26 covered by the North West locales in 2015 (at 1,935,683) [3]. We then applied this local point  
27 prevalence figure to the UK population of 66,796,800 for mid-2019 [21] which assumes that the point  
28 prevalence in the North West is similar to the rest of the UK. We further assume that our point  
29 prevalence is representative at every point of the year across the UK.  
30  
31  
32  
33  
34

35 For extrapolation to a national level we make two assumptions: (i) the Greater Manchester population  
36 is not dissimilar from the rest of the UK in terms of prevalence of people with venous leg ulcers and  
37 (ii) the two-week period from which the data came is similar to the rest of the year (i.e., there is no  
38 evidence of seasonal variation in venous leg ulcer prevalence). We compare our point prevalence with  
39 a similar study [15] to add face validity to these assumptions.  
40  
41  
42  
43

44 We were not able to calculate annual prevalence figures (in terms of people with one or more venous  
45 leg ulcer episode in a year) with our data: we lacked detailed contemporary incidence and ulcer duration  
46 data for individuals over this period. We could however, use our available data to estimate what the  
47 maximum annual prevalence of people with venous leg ulcers receiving treatment in the community  
48 may be by assuming a new set of patients being treated for a venous leg ulcer for every two-week period  
49 of the year. We did this to give a suggested minimum (our point prevalence figure) and maximum figure  
50 for the national annual prevalence of people treated in the community for venous leg ulceration. We  
51 also estimated an annual period prevalence of venous leg ulcers using the incidence rate estimated by  
52 Petherick et al [22] using THIN data. As sensitivity around our prevalence results, we further remove  
53 patients who have a venous leg ulcer that is not their primary (most severe) wound.  
54  
55  
56  
57  
58  
59  
60



## 2.6 Extrapolation of cost to a national level

To calculate the total annual cost of care for venous leg ulcers in the UK we used our individual level cost data combined with our point prevalence estimates. The snapshot of data is assumed to be representative at the local level in terms of the costs and numbers of those with a venous leg ulcer of any two-week point in the year. Therefore, we can scale the total cost obtained in our data to achieve the annual national cost of community treated venous leg ulcers. As noted earlier, due to data limitations we can only speculate what the corresponding annual prevalence associated with the annual cost we produce could be. The annual prevalence figures we derive from using a different source are used (in the denominator) with the estimated total national cost (in the numerator) to obtain an estimated per person annual cost. We did not have a total cost for patients where the venous leg ulcer was not their primary (most severe) wound. We therefore applied the average cost from the primary venous leg ulcer group to the non-primary group when calculating the estimated total national cost and per person annual cost.

## 2.7 Patient and public involvement

There was no patient or public involvement in this study.

## 3 Results

### 3.1 Community survey data: summary statistics

Of the 3057 patients recorded in the survey as being treated in the community for one or more complex wounds, 570 (18.7%) had a venous leg ulcer recorded as their primary (most severe) wound.

The average age of people with venous leg ulcers was 73.5 years old, with most patients being White British (92.6%) and living in owned/rented accommodation (88.9%) (Table 1). Amongst health-related variables: 54.2% of those with a venous leg ulcer could only walk with difficulty, on average patients had 1.95 wounds and 1.35 co-morbidities.



Table 1: Summary characteristics of 570 survey patients with a venous leg ulcer as their primary (most severe) wound

|                                       | N   | % or mean     |
|---------------------------------------|-----|---------------|
| Sex (n=531):                          |     |               |
| Female                                | 288 | 54.2%         |
| Male                                  | 243 | 45.8%         |
| Age (years)                           |     |               |
|                                       | 562 | 73.52 (14.48) |
| Ethnicity (n=565):                    |     |               |
| White British                         | 523 | 92.6%         |
| Black, Asian or Minority Ethnic Group | 42  | 7.4%          |
| Residency (n=566):                    |     |               |
| Owned/rented                          | 503 | 88.9%         |
| Other                                 | 63  | 11.1%         |
| Mobility (n=563):                     |     |               |
| Walks freely                          | 305 | 41.9%         |
| Walks with difficulty                 | 236 | 54.2%         |
| Immobile                              | 22  | 3.9%          |
| Number of wounds                      |     |               |
|                                       | 570 | 1.95 (1.87)   |
| Number of co-morbidities              |     |               |
|                                       | 570 | 1.39 (1.13)   |
| Received most wound care (n=569):     |     |               |
| Non-clinical setting                  | 257 | 45.2%         |
| Clinical setting                      | 312 | 54.8%         |

Treatment and community staff ulcer-related resource use from the 570 patients whose primary wound was a venous leg ulcer is shown in Table 2. The most common primary dressing type used was non-antimicrobial (54.7%). Among antimicrobial dressings, silver-containing dressings were the most commonly used (14.6%). The majority of those with a venous leg ulcer were receiving some type of bandage (74.6%). 37.5% of patients were reported to be in receipt of venous leg ulcer medications, the most commonly used was topic steroids (44.2% among those who had medication). Only one patient had no reported use of dressing, bandages, hosiery, medication nor community healthcare use. On average, patients received 1.9 visits per week from community nurses, lasting 34.9 minutes on average.

Table 2: Summary statistics of direct healthcare resource use amongst 570 survey patients with a venous leg ulcer as their primary (most severe) wound

|                                 | N with this cost | % of total patients |
|---------------------------------|------------------|---------------------|
| <b>Primary Dressing:</b>        |                  |                     |
| Honey                           | 51               | 8.9                 |
| Iodine                          | 24               | 4.2                 |
| Silver                          | 83               | 14.6                |
| Other antimicrobial             | 36               | 6.3                 |
| Non-antimicrobial               | 312              | 54.7                |
| No dressing reported            | 64               | 11.2                |
| <b>Secondary Dressing:</b>      |                  |                     |
| Honey                           | 1                | 0.2                 |
| Silver                          | 5                | 0.9                 |
| Non-antimicrobial               | 250              | 43.9                |
| No dressing                     | 314              | 55.1                |
| Any secondary dressing reported | 260              | 45.6                |
| <b>Bandages:</b>                |                  |                     |
| No bandage reported             | 145              | 25.4                |
| 4 layer compression             | 52               | 9.1                 |
| Short stretch                   | 63               | 11.1                |
| 3 layer reduced compression     | 98               | 17.2                |
| 2 layer compression             | 82               | 14.4                |
| Non compression                 | 57               | 10.0                |
| Dressing retention              | 24               | 4.2                 |
| Other                           | 49               | 8.6                 |
| <b>Hosiery:</b>                 |                  |                     |
| No hosiery reported             | 464              | 81.4                |
| Class 1                         | 40               | 7.0                 |
| Class 2                         | 51               | 8.9                 |
| Class 3                         | 14               | 2.5                 |
| Other                           | 1                | 0.2                 |
| <b>Ulcer-related medicines:</b> |                  |                     |
| Antibiotic                      | 51               | 8.9                 |
| Topical steroids                | 88               | 15.4                |
| Analgesics                      | 60               | 10.5                |
| No medicines reported           | 371              | 65.1                |

### 3.2 Community Care Costs

Table 3 summarises the wound-related healthcare costs of 570 people with their primary (most severe) wound recorded as a venous leg ulcer over a two-week period. The mean, per person, community-based ulcer treatment cost was £147.19 (95% CI: £138.58 to £155.80). Community staff time was the costliest element, representing 70.9% of the total community care cost. Among costs not related to staff time, dressing and bandage use accounted for the largest proportions of the total cost at 14.1% and 13.0%, respectively.

Table 3: Community healthcare costs £ (2019 prices) of individual venous leg ulcer treatment over two weeks

| Cost component  | Mean £ (% of total) | SD      | 95% CI: |        | 25 <sup>th</sup> Percentile | Median | 75 <sup>th</sup> Percentile |
|-----------------|---------------------|---------|---------|--------|-----------------------------|--------|-----------------------------|
|                 |                     |         | Lower   | Upper  |                             |        |                             |
| Dressing        | 20.76 (14.1)        | 13.52   | 19.64   | 21.87  | 12.82                       | 14.36  | 25.64                       |
| Bandages        | 19.19 (13.0)        | 19.06   | 17.62   | 20.76  | 0                           | 13.35  | 34.18                       |
| Hosiery         | 0.77 (0.5)          | 1.61    | 0.61    | 0.92   | 0                           | 0      | 0                           |
| Medication      | 2.31 (1.6)          | 3.63    | 2.01    | 2.61   | 0                           | 0      | 4.75                        |
| Community staff | 104.35 (70.9)       | 97.65   | 96.32   | 112.38 | 46.20                       | 81.5   | 127.70                      |
| All community   | 147.19              | 104.697 | 138.58  | 155.80 | 80.16                       | 120.03 | 179.49                      |

Note: We recoded one outlier of 62 nurse visits to the next highest value at 8 visits

### 3.3 Variation in Community Care Costs

We explored variation in the community care cost of treating a venous leg ulcer over a two-week period among 514 patients with complete information on covariates (Table 4). Treatment with a honey, silver or other antimicrobial primary dressing is associated with, on average, higher costs compared with use of a non-antimicrobial dressing. For example, use of a silver primary dressing is associated with a £65.27 (95% CI: £38.02 to £92.52) higher per-person cost on average than for people treated with a non-antimicrobial primary dressing. Patients who received most of their wound care in a clinic setting have £-44.91 (95% CI: -£64.68 to -£25.14) lower two-week community costs than people who received care in a non-clinic setting. For each extra reported wound, the patient has a higher average two weekly cost of £9.69 (95% CI: £4.06 to £15.33) associated with their venous leg ulcer. Those who walk with difficulty and those who are unable to walk have higher total costs of £37.75 (95% CI: £-8.50 to £84.01) and £20.25 (95% CI: £0.59 to £39.92), respectively, compared with those who can walk freely, although the latter difference is not statistically significant.

Table 4: Variation in the total cost of venous leg ulcer treatment over a two-week period

|                                                                | Difference in GBP | 95% Confidence interval |
|----------------------------------------------------------------|-------------------|-------------------------|
| Dressing: Honey (ref=non-antimicrobial)                        | 18.59*            | (-2.52 to 39.69)        |
| Dressing: Iodine (ref=non-antimicrobial)                       | -11.78            | (-42.54 to 18.98)       |
| Dressing: Silver (ref=non-antimicrobial)                       | 65.27***          | (38.02 to 92.52)        |
| Dressing: Other antimicrobial (ref=non-antimicrobial)          | 29.43*            | (-4.06 to 62.91)        |
| Dressing: Not reported (ref=non-antimicrobial)                 | 8.98              | (-27.21 to 45.17)       |
| Any secondary dressing                                         | 9.38              | (-5.93 to 24.69)        |
| Any bandage use                                                | 48.63***          | (27.24 to 70.02)        |
| Any hosiery                                                    | -9.37             | (-31.34 to 12.61)       |
| Any medication                                                 | 24.76***          | (9.42 to 40.11)         |
| Most wound related care in clinical setting (ref=non-clinical) | -44.91***         | (-64.68 to -25.14)      |
| Female                                                         | -25.56            | (-64.53 to 13.40)       |
| Age (50-69 years old)                                          | -14.64            | (-50.43 to 21.15)       |
| Age (70-79 years old)                                          | -22.74            | (-57.19 to 11.71)       |
| Age (80+ years old)                                            | -39.33**          | (-74.02 to -4.64)       |
| Female*Age (50-69 years old)                                   | 32.93             | (-19.61 to 85.48)       |
| Female*Age (70-79 years old)                                   | 22.51             | (-24.05 to 69.07)       |
| Female*Age (80+ years old)                                     | 22.78             | (-21.01 to 66.56)       |
| White British (ref=other)                                      | 10.59             | (-15.54 to 36.72)       |
| Owned/ rented residence (ref=other)                            | -8.83             | (-36.39 to 18.73)       |
| Mobility: Walks with difficulty (ref=walks freely)             | 20.25**           | (0.59 to 39.92)         |
| Mobility: Immobile (ref=walks freely)                          | 37.75             | (-8.50 to 84.01)        |
| Number of wounds                                               | 9.69***           | (4.06 to 15.33)         |
| Number of co-morbidities                                       | 0.50              | (-6.12 to 7.11)         |
| Constant                                                       | 103.09***         | (50.79 to 155.39)       |
| N                                                              | 514               |                         |

Note: Coefficients estimated using ordinary least squares regression. \*p<0.1; \*\*p<0.05; \*\*\*p<0.01

### 3.4 Primary and Secondary Care Costs

Primary and secondary care costs add £19.20 to the total community care cost for all patients (Table 5). This results in a total mean two weekly per person healthcare (including primary and secondary care use) cost of £166.39 (95% CI: £157.78 to £175.00).

Table 5: healthcare costs £ (2019 prices) for venous ulcer treatment

| Cost component      | Mean £ (% of total) | SD     | CI: Lower | CI: Upper | 25 <sup>th</sup> Percentile | Median | 75 <sup>th</sup> Percentile |
|---------------------|---------------------|--------|-----------|-----------|-----------------------------|--------|-----------------------------|
| Primary & Secondary | 19.20 (20.65)       | -      | -         | -         | -                           | -      | -                           |
| Total healthcare    | 166.39              | 104.69 | 157.78    | 175.00    | 99.36                       | 139.23 | 198.69                      |

### 3.5 Extrapolation of Prevalence and Costs

The point prevalence of people with a venous leg ulcer in participating locales in the North West of England was 0.032% or 3.2 per 10 000 population (calculated as  $(612/1935683)*10000$ ; shown in Table 6); a figure only 0.3 per 10 000 population larger than a previous UK estimate [15]. This figure includes those with a venous leg ulcer as their primary (most severe) wound and those a venous leg ulcer as their non-primary wound. Application of this point prevalence estimate nationally suggests 21,119 people are treated in the community for a venous leg ulcer in the UK at any point in time. If we assume the point prevalence is constant throughout the year but with different patients at each time point we obtain a theoretical maximum annual period prevalence of 84.5 per 10,000 population. This is an extreme assumption suggesting a theoretical incidence rate of 81.3 per 10,000 population, which is very high compared with a previously estimated incidence rate from THIN data of 10 per 10,000 population [22]. We combined the incidence rate from Petherick et al [22] with our data to derive an annual period prevalence estimate of 13.2 per 10 000 persons which is 6.4 times smaller than our maximum annual prevalence estimate. Our point prevalence decreases from 3.2 to 2.9 per 10 000 population once we exclude those for whom their venous leg ulcer is not the primary (most severe) wound.

From our data we estimate the annual community cost of treating venous leg ulcers to be £81,039,192 for the UK for those where the venous leg ulcer was the primary or non-primary wound. Including primary and secondary care costs increases the figure to £102,122,480. As noted above the corresponding annual prevalence figure for our annual costs can be no higher than 84.5 per 10000 persons. Calculating a per person annual cost which includes primary and secondary care using the incidence rate from Petherick et al [22] provides a cost of £4787.70.

Table 6: Prevalence and total estimated costs of people treated in the community for venous leg ulceration with extrapolation to National levels

|                                                                                     | National Level <sup>^*</sup> |
|-------------------------------------------------------------------------------------|------------------------------|
| <b>Prevalence (primary and non-primary wound):</b>                                  |                              |
| Point                                                                               | 3.2 per 10000 persons        |
| Annual (calculated with Petherick et al., [22] <sup>b</sup> incidence value)        | 13.2 per 10000 persons       |
| Annual (calculated using theoretical maximum incidence based on survey data)        | 84.5 per 10000 persons       |
| <b>Annual Total Costs (primary and non-primary wound):</b>                          |                              |
| Community based (based on assumed representativeness of survey data over 12 months) | £81,039,192                  |
| Per person (using annual prevalence calculated from Petherick et al [22] incidence) | £3799.27 <sup>a</sup>        |
| Per person (using annual prevalence calculated with maximum incidence assumption)   | £147.19 <sup>a</sup>         |
| Community + primary +secondary care                                                 | £102,122,480                 |
| Per person (Petherick et al [22] incidence as above )                               | £4787.70 <sup>a</sup>        |
| Per person (maximum prevalence)                                                     | £185.48 <sup>a</sup>         |
| <b>Prevalence (primary wound only):</b>                                             |                              |
| Point                                                                               | 2.9 per 10000 persons        |
| Annual (calculated with Petherick et al., [22] <sup>b</sup> incidence value)        | 12.9 per 10000 persons       |
| Annual (calculated using theoretical maximum incidence based on survey data)        | 76.8 per 10000 persons       |
| <b>Annual Total Costs (primary wound only):</b>                                     |                              |
| Community based (based on assumed representativeness of survey data over 12 months) | £75,477,680                  |
| Per person (using annual prevalence calculated from Petherick et al [22] incidence) | £3799.21 <sup>a</sup>        |
| Per person (using annual prevalence calculated with maximum incidence assumption)   | £147.19 <sup>a</sup>         |
| Community + primary +secondary care                                                 | £95,114,080                  |
| Per person (Petherick et al [22] incidence as above )                               | £4787.61 <sup>a</sup>        |
| Per person (maximum prevalence)                                                     | £185.48 <sup>a</sup>         |

Note: <sup>^</sup>Assuming the point prevalence from the survey based on a population of 1 935 683 from nine North West community care trusts in England is representative of the rest of the UK. <sup>\*</sup>Based on the 2019 mid-year population estimate of the UK at 66,796,800 [21]. <sup>a</sup>Derived using the total cost in the numerator and the estimated number with a venous leg ulcer annually in the denominator. <sup>b</sup>Petherick et al [22] incidence rate is 10 per 10 000 persons

#### 4 Discussion

To date there has been limited use of community-collected information to inform service level cost estimates of treating venous leg ulcers. Our cost-of-illness analysis addresses this gap in the literature. We extend the coverage of our community-sourced resource use and cost data with inclusion of primary and secondary care resource use to obtain a more complete figure on direct healthcare costs.

The average two-week per person cost of treating a venous leg ulceration was estimated as £166.39 (95% CI: £157.78 to £175.00) with community staff time making up over half this total. Using

1  
2  
3 community data only, estimated annual costs were higher where anti-microbial dressings were used and  
4 where wound care was delivered in the home. We can draw limited conclusions about the contribution  
5 of these factors to increased costs as people with more serious and slower to heal wounds may be more  
6 likely to receive care at home and/or anti-microbial dressings. However there is currently no clear  
7 evidence of benefit associated with the use of silver or any other antimicrobial dressings [19,20].  
8 Likewise, treatment delivered in clinics where possible, rather than in patient homes, likely offers  
9 savings in terms of staff time but it is also likely the least complex patients seen in clinic settings. Patient  
10 characteristics such as age, mobility and the numbers of wounds were also associated with variation in  
11 the total cost.  
12  
13  
14  
15  
16  
17

18 Our point prevalence of 3.2 per 10,000 population triangulates well with other studies that also use  
19 regional UK data and reinforces the face validity of our extrapolation of cost and prevalence to a  
20 national level. For example, the figure is only 0.3 higher to the 2.9 (95% CI: 2.5 to 3.3) per 10 000  
21 population from Hall et al [15] which used a similar protocol but in different areas of the UK with  
22 different staff and was undertaken some years earlier. Hall et al [15] also included those receiving care  
23 in acute settings in their figures. An older study which used THIN data from 2001 to 2006 estimated an  
24 annual prevalence of 8.28 per 10 000 (95% CI 8.17 to 8.39) person years and 14.07 (95% CI: 8.17 to  
25 8.39) per 10 000 person years from the same time period using the General Practice Research Database  
26 [22]. Our results are robust to the exclusion of those with a venous leg ulcer that is not their non-primary  
27 wound, decreasing the point prevalence by 0.3 to 2.9 per 10,000 population.  
28  
29  
30  
31  
32  
33  
34

35 We were unable to estimate an annual period prevalence figure from our point prevalence estimate  
36 because we lacked contemporaneous incidence and duration data. However, we could use our data to  
37 suggest that the annual prevalence of people with venous leg ulceration *can be no greater than* 84.5 per  
38 10,000 population (using incidence rates reported in the literature). The annual prevalence of 59 per  
39 10,000 population (assumed to mean 59 people not 59 ulcers) reported by Guest et al [7], is below our  
40 maximum annual prevalence, but still very high given the extreme incidence of leg ulceration that would  
41 be required to achieve these figures. Both estimates assume an incidence rate far in excess of those  
42 found in the literature using THIN data at 14 per 10,000 population [22]. Guest et al. [7] also reported  
43 an additional 85 per 10,000 population as having an unspecified leg ulcer. If we assume that at least  
44 60% of Guest's unspecified leg ulcers are venous leg ulcers then the annual prevalence is increased to  
45 110 per 10,000 annually: our data questions the validity of such high values.  
46  
47  
48  
49  
50  
51  
52

53 We estimate a national annual cost attributable to treating those with a venous leg ulcer as the primary  
54 (most severe) wound at £95.11 million; an estimate that is only 15.9% of the £596.55 million reported  
55 by Guest et al [8] as the lower end of their estimate (with an upper estimate of £921.94 million). Our  
56 estimated per-person annual cost of a venous leg at £4787.70, which uses the incidence rate of Petherick  
57 et al [22], is 62.6% of the equivalent cost obtained by Guest et al [7] at £7615.03. Key differences are  
58  
59  
60



1  
2  
3 that Guest et al [7,8] used information from a GP based dataset that included a study population of 505  
4 selected from a random sample of 6000 patients in the THIN database. By contrast, we used a bottom-  
5 up approach to costing, using information from audits of all patients treated by participating NHS  
6 organisations. The costing method of Guest et al [7] compared the costs of 505 venous leg ulcer patients  
7 to those without a venous leg ulcer to obtain the incremental cost. Importantly our cost components  
8 were similar to those of Guest et al [7], and we agree that community staff time is the largest component  
9 of the total cost. Guest et al [7] also considered the cost of care delivered once people's ulcers had  
10 healed. This may explain some of the differences in cost although ulcer-related care in the absence of  
11 an actual wound is likely to be limited.  
12  
13

14  
15  
16  
17  
18 Data used for this study offers advantages over primary care collected data as it directly captured  
19 community nurse activity for costing. Our study also has limitations: our extrapolation of costs and  
20 prevalence relies upon assumptions that the nine locales are similar to the rest of the UK and at different  
21 points within the year. More specifically, if the populations included in the nine locales are older and  
22 are more deprived than the a 'typical' local, then our cost and prevalence can be considered an  
23 overestimate. We searched the literature for further evidence of seasonal variation in leg ulcer incidence  
24 and found none, nor any biological basis for thinking that one might exist. Extrapolation aside, our  
25 study represents the venous leg ulcer point prevalence and treatment based on an area of roughly 2  
26 million people.  
27  
28  
29  
30  
31

32  
33 We also note that we only considered the costs associated with bandages and dressings for the primary  
34 wound and we assumed all recorded visits were with a nurse. Recording of ulcer-related staff time may  
35 be overestimated if the healthcare profession did not distinguish between visits that were for care of the  
36 primary wound and no other wounds or co-morbidities. We were not able to calculate community costs  
37 for those whom the venous leg ulcer was not the primary (most severe) wound. Thus, in extrapolating  
38 costs using a point prevalence of primary (most severe) and non-primary venous leg ulcers, we have  
39 assumed no difference in community costs incurred for those with venous leg ulcers as their primary  
40 (most severe) or non-primary wound. However, the vast majority of people surveyed had a venous leg  
41 ulcer as their primary wound, with an increase of only 0.3 per 10,000 population once those a non-  
42 primary venous leg ulcer were included.  
43  
44  
45  
46  
47  
48

49  
50 There is little information on travel time by nurses and current reimbursement based on distance;  
51 therefore, we used old rates of reimbursement per visit. A further limitation is that we only had direct  
52 healthcare resource use to use for costing. Other direct costs such as surgery and indirect costs such as  
53 productivity loss were not available which we note as future areas to obtain cost information.  
54  
55  
56

57 Whilst our regression analysis of total costs highlights factors associated with this cost, it cannot be  
58 used to draw causal inference. For example, there may be unobserved factors relating to patient health  
59 that are not accounted for in the regression that may explain variation in the total cost.  
60



1  
2  
3 Leg ulcer care is costly to the NHS but we suggest it may not be as costly as has been claimed in  
4 previous highly cited and influential work [7,8,23]. There are difficulties in comparing the available  
5 data from different sources, in part due to a lack of information on methods used and further  
6 transparency may allow differences in figures to be better understood. Fundamentally, our ability to  
7 estimate costs, scrutinise the quality of care and observe links between care and outcomes in wound  
8 care is hampered by a lack of routinely collection and useable information in community services. The  
9 absence of a clinical database for community wound care also hinders clinical communication and  
10 monitoring of patient progress. An accurate picture of the cost and prevalence of venous leg ulcers,  
11 which we have aimed to provide in this study, can be used to further understand the cost and scale of  
12 wound care and a basis from which to more realistically estimate the scale of potential savings.  
13  
14  
15  
16  
17  
18  
19

20 **Contributors:** NC and JD conceived the idea for the overall project. SU, JD, NC and MS contributed  
21 to the study design. SU was responsible for data analysis. SU created the original draft of the  
22 manuscript. SU, JD, NC and MS contributed to the interpretation of study findings, critical revision of  
23 the manuscript for important intellectual content and approval of the final manuscript.  
24  
25

26 **Funding statement** This work was supported by Innovate UK grant number 104546  
27

28 **Competing interests** None declared  
29

30 **Disclaimer: To add**  
31

32 **Ethics approval: Not required**  
33

34 **Data availability statement:** No additional data are available  
35  
36  
37

### 38 **References**

- 39 1 Franks PJ, Morgan PA. Health-related quality of life with chronic leg ulceration. *Expert Review*  
40 *of Pharmacoeconomics & Outcomes Research* 2014
- 41 2 Green J, Jester R, McKinley R, *et al.* The impact of chronic venous leg ulcers: a systematic  
42 review. *J Wound Care* 2014;**23**:601–12. doi:10.12968/jowc.2014.23.12.601
- 43 3 Gray TA, Rhodes S, Atkinson RA, *et al.* Opportunities for better value wound care: a  
44 multiservice, cross-sectional survey of complex wounds and their care in a UK community  
45 population. *BMJ Open* 2018;**8**:e019440. doi:10.1136/bmjopen-2017-019440
- 46 4 Bennett G, Dealey C, Posnett J. The cost of pressure ulcers in the UK. *Age Ageing* 2004;**33**:230–  
47 5. doi:10.1093/ageing/afh086
- 48 5 Rice DP. Cost of illness studies: what is good about them? *Injury Prevention* 2000;**6**:177–9.  
49 doi:10.1136/ip.6.3.177
- 50 6 Onukwugha E, McRae J, Kravetz A, *et al.* Cost-of-Illness Studies: An Updated Review of  
51 Current Methods. *Pharmacoeconomics* 2016;**34**:43–58. doi:10.1007/s40273-015-0325-4
- 52 7 Guest JF, Fuller GW, Vowden P. Venous leg ulcer management in clinical practice in the UK:  
53 costs and outcomes. *International Wound Journal* 2018;**15**:29–37. doi:10.1111/iwj.12814  
54  
55  
56  
57  
58  
59  
60

- 1
  - 2
  - 3
  - 4
  - 5
  - 6
  - 7
  - 8 Guest JF, Ayoub N, McIlwraith T, *et al.* Health economic burden that different wound types impose on the UK's National Health Service. *International Wound Journal* 2017;**14**:322–30. doi:10.1111/iwj.12603
  - 9
  - 10
  - 11
  - 12
  - 13
  - 14
  - 15
  - 16
  - 17
  - 18
  - 19
  - 20
  - 21
  - 22
  - 23
  - 24
  - 25
  - 26
  - 27
  - 28
  - 29
  - 30
  - 31
  - 32
  - 33
  - 34
  - 35
  - 36
  - 37
  - 38
  - 39
  - 40
  - 41
  - 42
  - 43
  - 44
  - 45
  - 46
  - 47
  - 48
  - 49
  - 50
  - 51
  - 52
  - 53
  - 54
  - 55
  - 56
  - 57
  - 58
  - 59
  - 60
- 9 Ashby RL, Gabe R, Ali S, *et al.* VenUS IV (Venous leg Ulcer Study IV) - compression hosiery compared with compression bandaging in the treatment of venous leg ulcers: a randomised controlled trial, mixed-treatment comparison and decision-analytic model. *Health Technol Assess* 2014;**18**:1–293, v–vi. doi:10.3310/hta18570
- 10 Costa N, Derumeaux H, Rapp T, *et al.* Methodological considerations in cost of illness studies on Alzheimer disease. *Health Econ Rev* 2012;**2**:18. doi:10.1186/2191-1991-2-18
- 11 Molinier L, Bauvin E, Combescure C, *et al.* Methodological Considerations in Cost of Prostate Cancer Studies: A Systematic Review. *Value in Health* 2008;**11**:878–85. doi:10.1111/j.1524-4733.2008.00327.x
- 12 Larg A, Moss JR. Cost-of-illness studies. *Pharmacoeconomics* 2011;**29**:653–671.
- 13 Chan B, Cadarette S, Wodchis W, *et al.* Cost-of-illness studies in chronic ulcers: a systematic review. *Journal of Wound Care* 2017;**26**:S4–14. doi:10.12968/jowc.2017.26.Sup4.S4
- 14 Mairghani M, Jassim G, Elmusharaf K, *et al.* Methodological approaches for assessing the cost of diabetic foot ulcers: a systematic literature review. *Journal of Wound Care* 2019;**28**:261–6. doi:10.12968/jowc.2019.28.5.261
- 15 Hall J, Buckley HL, Lamb KA, *et al.* Point prevalence of complex wounds in a defined United Kingdom population. *Wound Repair and Regeneration* 2014;**22**:694–700. doi:10.1111/wrr.12230
- 16 Joint Formulary Committee *British National Formulary*. Available at <http://www.medicinescomplete.com>. (accessed 24 Jun 2020).
- 17 Curtis LA, Burns A. *Unit Costs of Health and Social Care 2019*. Kent, UK: PSSRU 2019. <https://doi.org/10.22024/UniKent/01.02.79286> (accessed 30 Mar 2020).
- 18 Curtis, L. *Unit Costs of Health and Social Care 2010*, Personal Social Services Research Unit, University of Kent, Canterbury. <https://www.pssru.ac.uk/project-pages/unit-costs/unit-costs-2010/> (accessed 30 March 2020).
- 19 Scottish Intercollegiate Guidelines Network. *Management of chronic venous leg ulcers: a national clinical guideline*. Edinburgh: : Scottish Intercollegiate Guidelines Network 2010.
- 20 Hussey L, Stocks SJ, Wilson P, *et al.* Use of antimicrobial dressings in England and the association with published clinical guidance: interrupted time series analysis. *BMJ Open* 2019;**9**:e028727. doi:10.1136/bmjopen-2018-028727
- 21 ONS. Population estimates for the UK, England and Wales, Scotland and Northern Ireland, provisional. <https://www.ons.gov.uk/peoplepopulationandcommunity/populationandmigration/populationestimates/bulletins/annualmidyearpopulationestimates/mid2019> (accessed 18 May 2020).
- 22 Petherick ES, Pickett KE, Cullum NA. Can different primary care databases produce comparable estimates of burden of disease: results of a study exploring venous leg ulceration. *Family Practice* 2015;**;**cmv013. doi:10.1093/fampra/cmv013

- 1  
2  
3 23 Guest JF, Ayoub N, McIlwraith T, *et al.* Health economic burden that wounds impose on the  
4 National Health Service in the UK. *BMJ Open* 2015;**5**:e009283. doi:10.1136/bmjopen-2015-  
5 009283  
6  
7  
8  
9  
10  
11  
12  
13  
14  
15  
16  
17  
18  
19  
20  
21  
22  
23  
24  
25  
26  
27  
28  
29  
30  
31  
32  
33  
34  
35  
36  
37  
38  
39  
40  
41  
42  
43  
44  
45  
46  
47  
48  
49  
50  
51  
52  
53  
54  
55  
56  
57  
58  
59  
60

For peer review only

## Appendix

Table A1: Assigned unit costs

| Resource use item            | Cost (2019 prices)                | Source                         |
|------------------------------|-----------------------------------|--------------------------------|
| <b>Dressings:</b>            |                                   |                                |
| Honey                        | £5.89                             | Joint Formulary Committee [16] |
| Iodine                       | £0.41                             | Joint Formulary Committee [16] |
| Silver                       | £9.38                             | Joint Formulary Committee [16] |
| Other anti-microbial         | £5.80                             | Joint Formulary Committee [16] |
| Non anti-microbial           | £3.41                             | Joint Formulary Committee [16] |
| <b>Hosiery:</b>              |                                   |                                |
| Class 1                      | £23.92                            | Joint Formulary Committee [16] |
| Class 2                      | £23.99                            | Joint Formulary Committee [16] |
| Class 3                      | £29.04                            | Joint Formulary Committee [16] |
| Other                        | £29.75                            | Joint Formulary Committee [16] |
| <b>Bandages:</b>             |                                   |                                |
| 4 layer compression          | £9.29                             | Joint Formulary Committee [16] |
| Short stretch                | £3.55                             | Joint Formulary Committee [16] |
| 3 layer reduced compression  | £5.08                             | Joint Formulary Committee [16] |
| 2 layer compression          | £9.09                             | Joint Formulary Committee [16] |
| Non compression              | £1.79                             | Joint Formulary Committee [16] |
| Dressing retention           | £0.35                             | Joint Formulary Committee [16] |
| Other                        | £17.32                            | Joint Formulary Committee [16] |
| <b>Medication:</b>           |                                   |                                |
| Analgesics                   | £7.76                             | Joint Formulary Committee [16] |
| Topical Steroids             | £4.75                             | Joint Formulary Committee [16] |
| Pentoxifylline               | £13.68                            | Joint Formulary Committee [16] |
| Antibiotics                  | £4.94                             | Joint Formulary Committee [16] |
| <b>Healthcare use:</b>       |                                   |                                |
| Nurse visit use (home based) | £46 per hour                      | PSSRU Unit Costs 2019 [17]     |
|                              | £1.50 travel cost per visit       | PSSRU Unit Costs 2010 [18]     |
| Nurse, GP, Outpatient and    | £998.31 (applied to all patients) | VenUs IV trial [9]             |

**STROBE 2007 (v4) Statement—Checklist of items that should be included in reports of *cross-sectional studies***

| Section/Topic                | Item # | Recommendation                                                                                                                                                                       | Reported on page # |
|------------------------------|--------|--------------------------------------------------------------------------------------------------------------------------------------------------------------------------------------|--------------------|
| <b>Title and abstract</b>    | 1      | (a) Indicate the study's design with a commonly used term in the title or the abstract                                                                                               | 1                  |
|                              |        | (b) Provide in the abstract an informative and balanced summary of what was done and what was found                                                                                  | 2                  |
| <b>Introduction</b>          |        |                                                                                                                                                                                      |                    |
| Background/rationale         | 2      | Explain the scientific background and rationale for the investigation being reported                                                                                                 | 4,5                |
| Objectives                   | 3      | State specific objectives, including any prespecified hypotheses                                                                                                                     | 5                  |
| <b>Methods</b>               |        |                                                                                                                                                                                      |                    |
| Study design                 | 4      | Present key elements of study design early in the paper                                                                                                                              | 5                  |
| Setting                      | 5      | Describe the setting, locations, and relevant dates, including periods of recruitment, exposure, follow-up, and data collection                                                      | 5 & 6              |
| Participants                 | 6      | (a) Give the eligibility criteria, and the sources and methods of selection of participants                                                                                          | 5 & 6              |
| Variables                    | 7      | Clearly define all outcomes, exposures, predictors, potential confounders, and effect modifiers. Give diagnostic criteria, if applicable                                             | 5 & 6              |
| Data sources/<br>measurement | 8*     | For each variable of interest, give sources of data and details of methods of assessment (measurement). Describe comparability of assessment methods if there is more than one group | 5 & 6              |
| Bias                         | 9      | Describe any efforts to address potential sources of bias                                                                                                                            | -                  |
| Study size                   | 10     | Explain how the study size was arrived at                                                                                                                                            | 6                  |
| Quantitative variables       | 11     | Explain how quantitative variables were handled in the analyses. If applicable, describe which groupings were chosen and why                                                         | 5 & 6 & 7          |
| Statistical methods          | 12     | (a) Describe all statistical methods, including those used to control for confounding                                                                                                | 5 & 6 & 7          |
|                              |        | (b) Describe any methods used to examine subgroups and interactions                                                                                                                  | 7                  |
|                              |        | (c) Explain how missing data were addressed                                                                                                                                          | 6                  |
|                              |        | (d) If applicable, describe analytical methods taking account of sampling strategy                                                                                                   | -                  |
|                              |        | (e) Describe any sensitivity analyses                                                                                                                                                | 7                  |
| <b>Results</b>               |        |                                                                                                                                                                                      |                    |

|                          |     |                                                                                                                                                                                                              |         |
|--------------------------|-----|--------------------------------------------------------------------------------------------------------------------------------------------------------------------------------------------------------------|---------|
| Participants             | 13* | (a) Report numbers of individuals at each stage of study—eg numbers potentially eligible, examined for eligibility, confirmed eligible, included in the study, completing follow-up, and analysed            | 7 & 9   |
|                          |     | (b) Give reasons for non-participation at each stage                                                                                                                                                         | 8       |
|                          |     | (c) Consider use of a flow diagram                                                                                                                                                                           | -       |
| Descriptive data         | 14* | (a) Give characteristics of study participants (eg demographic, clinical, social) and information on exposures and potential confounders                                                                     | 8 & 9   |
|                          |     | (b) Indicate number of participants with missing data for each variable of interest                                                                                                                          | -       |
| Outcome data             | 15* | Report numbers of outcome events or summary measures                                                                                                                                                         | 9       |
| Main results             | 16  | (a) Give unadjusted estimates and, if applicable, confounder-adjusted estimates and their precision (eg, 95% confidence interval). Make clear which confounders were adjusted for and why they were included | -       |
|                          |     | (b) Report category boundaries when continuous variables were categorized                                                                                                                                    | -       |
|                          |     | (c) If relevant, consider translating estimates of relative risk into absolute risk for a meaningful time period                                                                                             | -       |
| Other analyses           | 17  | Report other analyses done—eg analyses of subgroups and interactions, and sensitivity analyses                                                                                                               | 11      |
| <b>Discussion</b>        |     |                                                                                                                                                                                                              |         |
| Key results              | 18  | Summarise key results with reference to study objectives                                                                                                                                                     | 12      |
| Limitations              | 19  | Discuss limitations of the study, taking into account sources of potential bias or imprecision. Discuss both direction and magnitude of any potential bias                                                   | 13      |
| Interpretation           | 20  | Give a cautious overall interpretation of results considering objectives, limitations, multiplicity of analyses, results from similar studies, and other relevant evidence                                   | 12 & 13 |
| Generalisability         | 21  | Discuss the generalisability (external validity) of the study results                                                                                                                                        | 12      |
| <b>Other information</b> |     |                                                                                                                                                                                                              |         |
| Funding                  | 22  | Give the source of funding and the role of the funders for the present study and, if applicable, for the original study on which the present article is based                                                | 16      |

\*Give information separately for cases and controls in case-control studies and, if applicable, for exposed and unexposed groups in cohort and cross-sectional studies.

**Note:** An Explanation and Elaboration article discusses each checklist item and gives methodological background and published examples of transparent reporting. The STROBE checklist is best used in conjunction with this article (freely available on the Web sites of PLoS Medicine at <http://www.plosmedicine.org/>, Annals of Internal Medicine at <http://www.annals.org/>, and Epidemiology at <http://www.epidem.com/>). Information on the STROBE Initiative is available at [www.strobe-statement.org](http://www.strobe-statement.org).
