# Supplementary material for: Health service costs of treating venous leg ulcers in the UK: evidence from a cross-sectional survey based in the north west of England
Source: PubMed Central journal article supplement — BMJ Open. 2022 Jan 6;12(1):e056790. doi: 10.1136/bmjopen-2021-056790 (PMC8739075; doi:10.1136/bmjopen-2021-056790), 2022-01-06
Supplement: bmjopen-2021-056790supp001.pdf [file bmjopen-2021-056790supp001.pdf]

## Appendix

Table A1: Assigned unit costs

| Resource use item            | Cost (2019 prices)                | Source                         |
|------------------------------|-----------------------------------|--------------------------------|
| <b>Dressings:</b>            |                                   |                                |
| Honey                        | £5.89                             | Joint Formulary Committee [16] |
| Iodine                       | £0.41                             | Joint Formulary Committee [16] |
| Silver                       | £9.38                             | Joint Formulary Committee [16] |
| Other anti-microbial         | £5.80                             | Joint Formulary Committee [16] |
| Non anti-microbial           | £3.41                             | Joint Formulary Committee [16] |
| <b>Hosiery:</b>              |                                   |                                |
| Class 1                      | £23.92                            | Joint Formulary Committee [16] |
| Class 2                      | £23.99                            | Joint Formulary Committee [16] |
| Class 3                      | £29.04                            | Joint Formulary Committee [16] |
| Other                        | £29.75                            | Joint Formulary Committee [16] |
| <b>Bandages:</b>             |                                   |                                |
| 4 layer compression          | £9.29                             | Joint Formulary Committee [16] |
| Short stretch                | £3.55                             | Joint Formulary Committee [16] |
| 3 layer reduced compression  | £5.08                             | Joint Formulary Committee [16] |
| 2 layer compression          | £9.09                             | Joint Formulary Committee [16] |
| Non compression              | £1.79                             | Joint Formulary Committee [16] |
| Dressing retention           | £0.35                             | Joint Formulary Committee [16] |
| Other                        | £17.32                            | Joint Formulary Committee [16] |
| <b>Medication:</b>           |                                   |                                |
| Analgesics                   | £7.76                             | Joint Formulary Committee [16] |
| Topical Steroids             | £4.75                             | Joint Formulary Committee [16] |
| Pentoxifylline               | £13.68                            | Joint Formulary Committee [16] |
| Antibiotics                  | £4.94                             | Joint Formulary Committee [16] |
| <b>Healthcare use:</b>       |                                   |                                |
| Nurse visit use (home based) | £46 per hour                      | PSSRU Unit Costs 2019 [17]     |
|                              | £1.50 travel cost per visit       | PSSRU Unit Costs 2010 [18]     |
| Nurse, GP, Outpatient and    | £998.31 (applied to all patients) | VenUs IV trial [9]             |
